# Supplementary material for: An observational human study investigating the effect of anabolic androgenic steroid use on the transcriptome of skeletal muscle and whole blood using RNA-Seq
Source: PubMed Central journal article supplement (PMC10157927; doi:10.1186/s12920-023-01512-z), 2023-05-03
Supplement: 12920_2023_1512_MOESM1_ESM.pdf [file 12920_2023_1512_MOESM1_ESM.pdf]

## Additional File 1 – MDS & PCA Plots

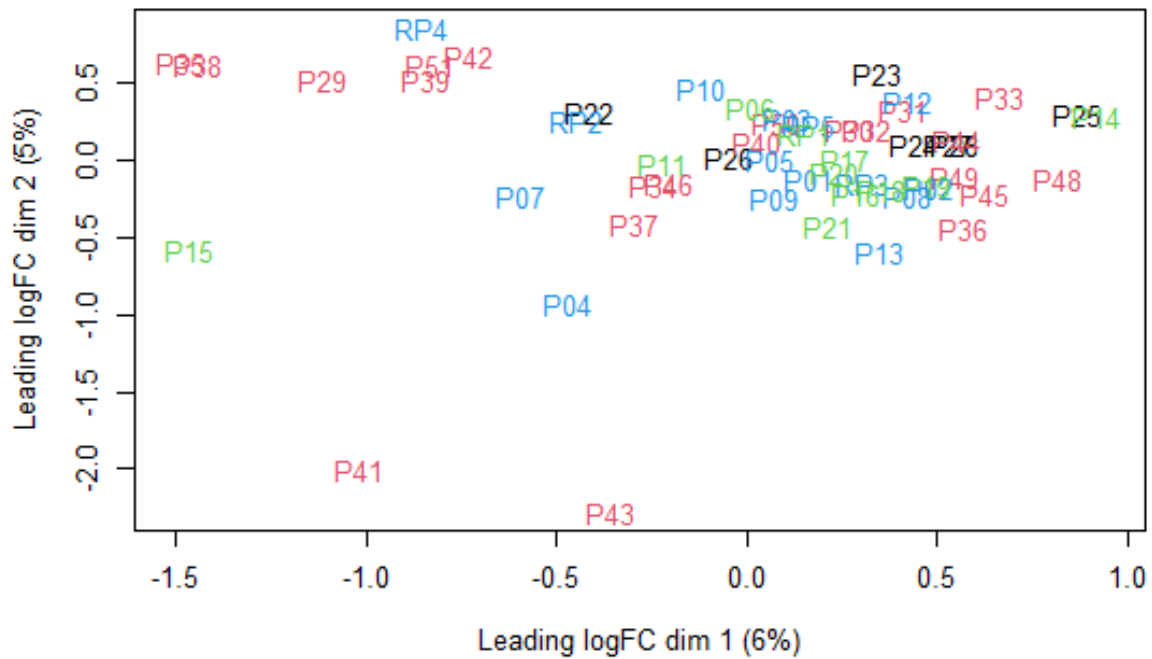

**Additional File 1 Figure 1a.** MDS Plot of blood samples (n=55) to be used in group comparisons sequenced at the University of Brighton with standard chemistry reagents from Group C (black, n=7), Group RT (red, n=22), Group RT-AS  $\leq 2$  (blue, n=15) and Group RT-AS  $\geq 10$  (green, n=11).

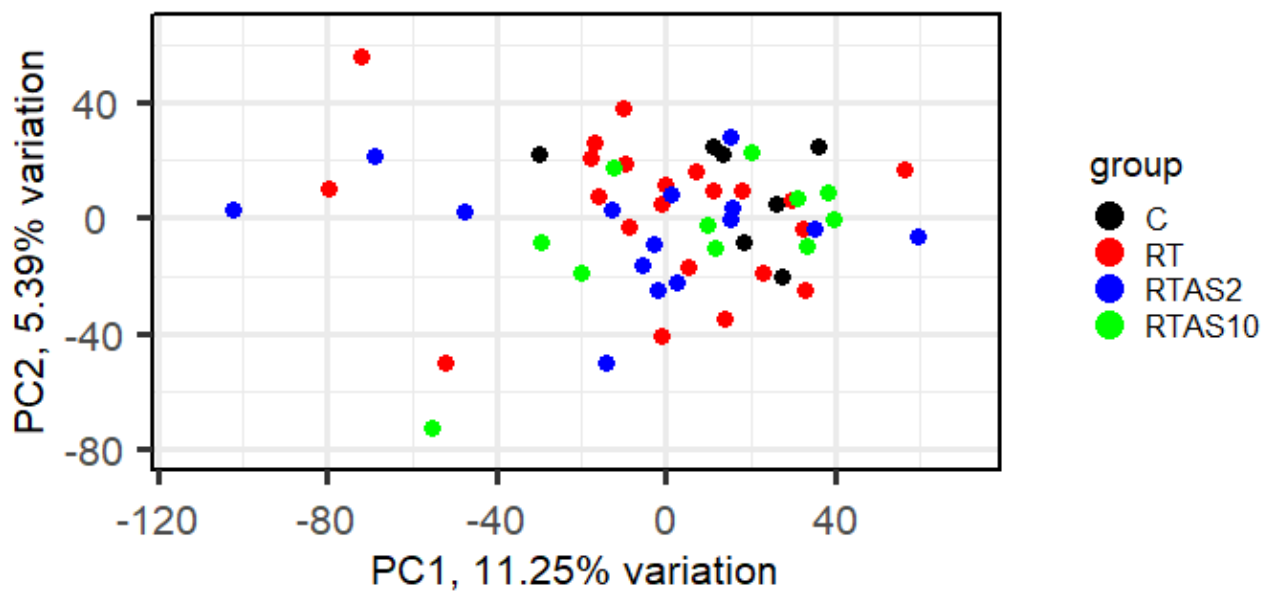

**Additional File 1 Figure 1b.** PCA Plot of blood samples (n=55) to be used in group comparisons sequenced at the University of Brighton with standard chemistry reagents from Group C (n=7), Group RT (n=22), Group RT-AS  $\leq 2$  (n=15) and Group RT-AS  $\geq 10$  (n=11).

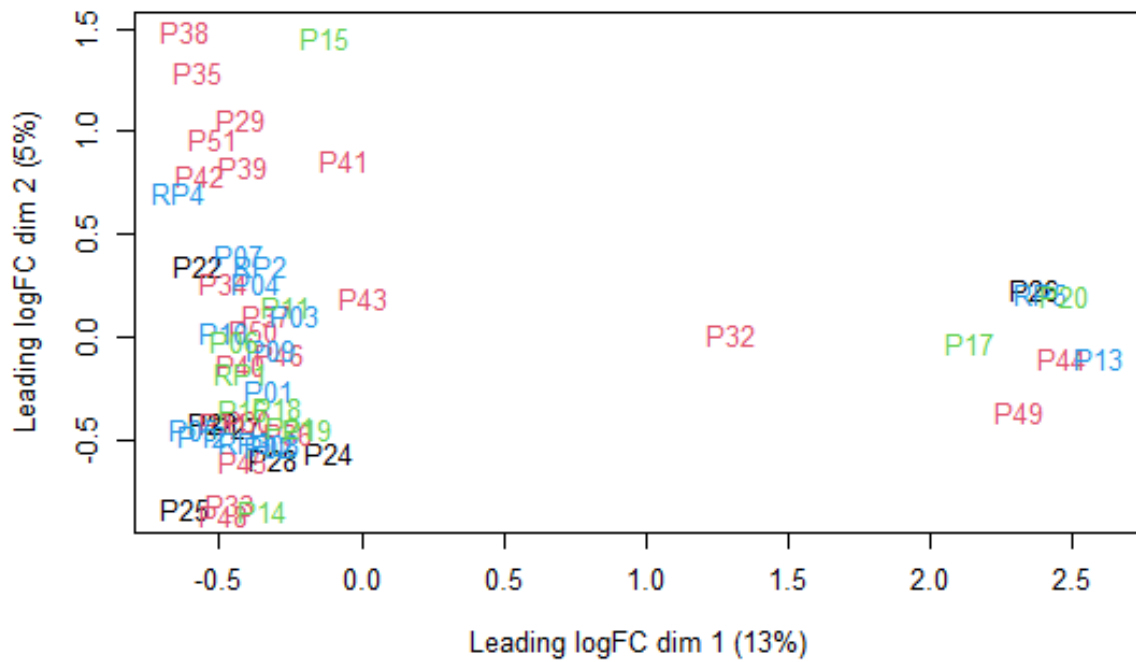

**Additional File 1 Figure 2a.** MDS Plot of blood samples (n=55) to be used in group comparisons sequenced at MGI with standard chemistry reagents from Group C (black, n=7), Group RT (red, n=22), Group RT-AS  $\leq 2$  (blue, n=15) and Group RT-AS  $\geq 10$  (green, n=11).

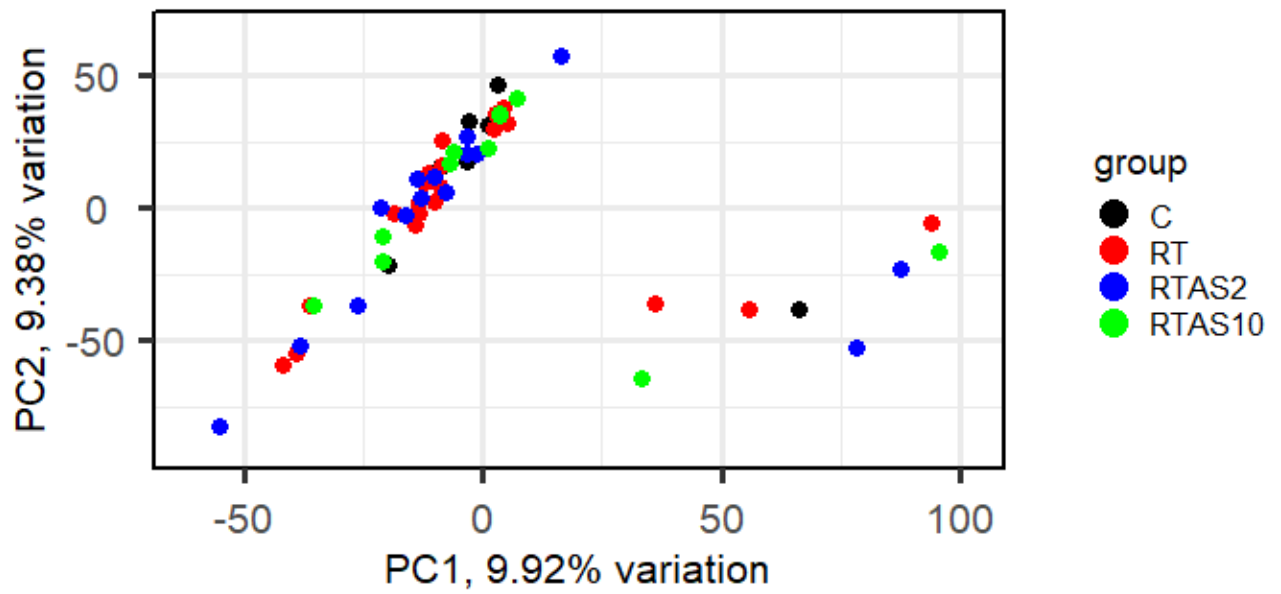

**Additional File 1 Figure 2b.** PCA Plot of blood samples (n=55) to be used in group comparisons sequenced at MGI with standard chemistry reagents from Group C (n=7), Group RT (n=22), Group RT-AS  $\leq 2$  (n=15) and Group RT-AS  $\geq 10$  (n=11).

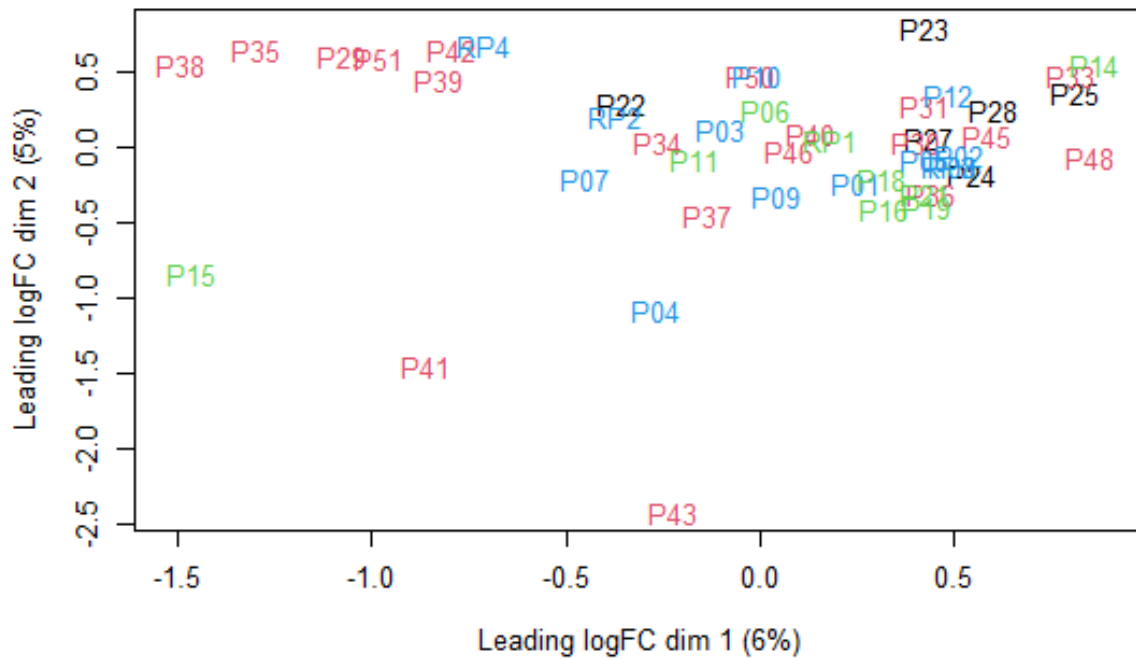

**Additional File 1 Figure 3a.** MDS Plot of blood samples (n=47) to be used in group comparisons sequenced at MGI with standard chemistry reagents after samples (n=8) sequenced on Flow Cell B Lane 1 were removed as outliers: Group C (black, n=6), Group RT (red, n=19), Group RT-AS  $\leq 2$  (blue, n=13) and Group RT-AS  $\geq 10$  (green, n=9).

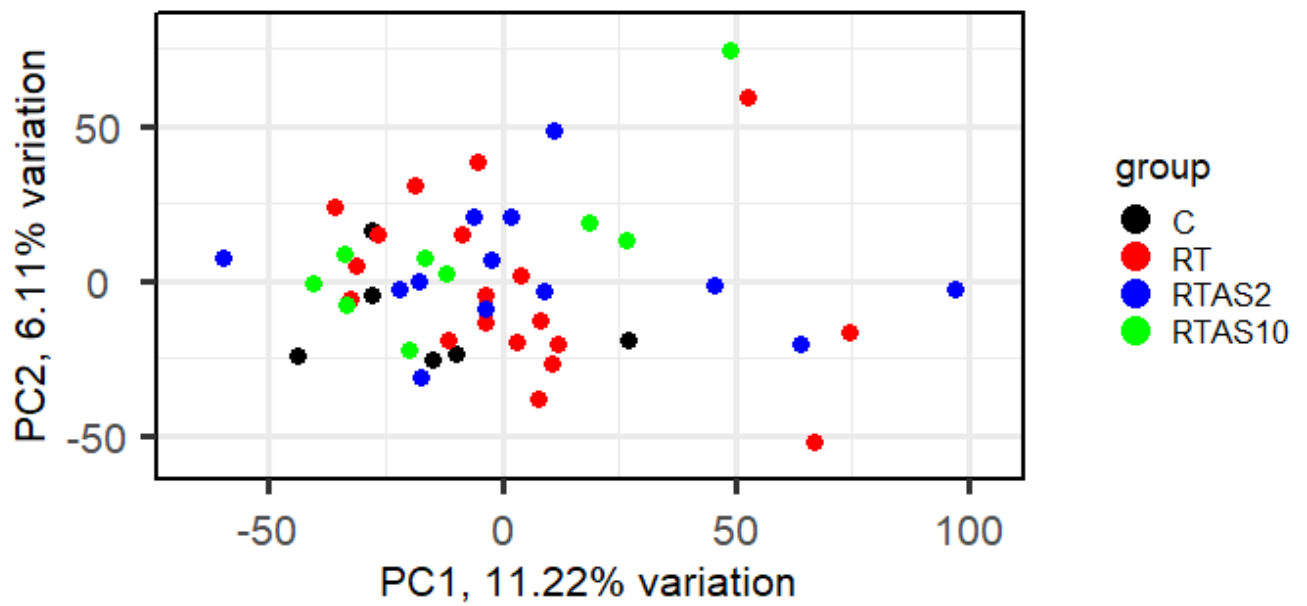

**Additional File 1 Figure 3b.** PCA Plot of blood samples (n=47) to be used in group comparisons sequenced at MGI with standard chemistry reagents after samples (n=8) sequenced on Flow Cell B Lane 1 were removed as outliers: Group C (n=6), Group RT (n=19), Group RT-AS  $\leq 2$  (n=13) and Group RT-AS  $\geq 10$  (n=9).

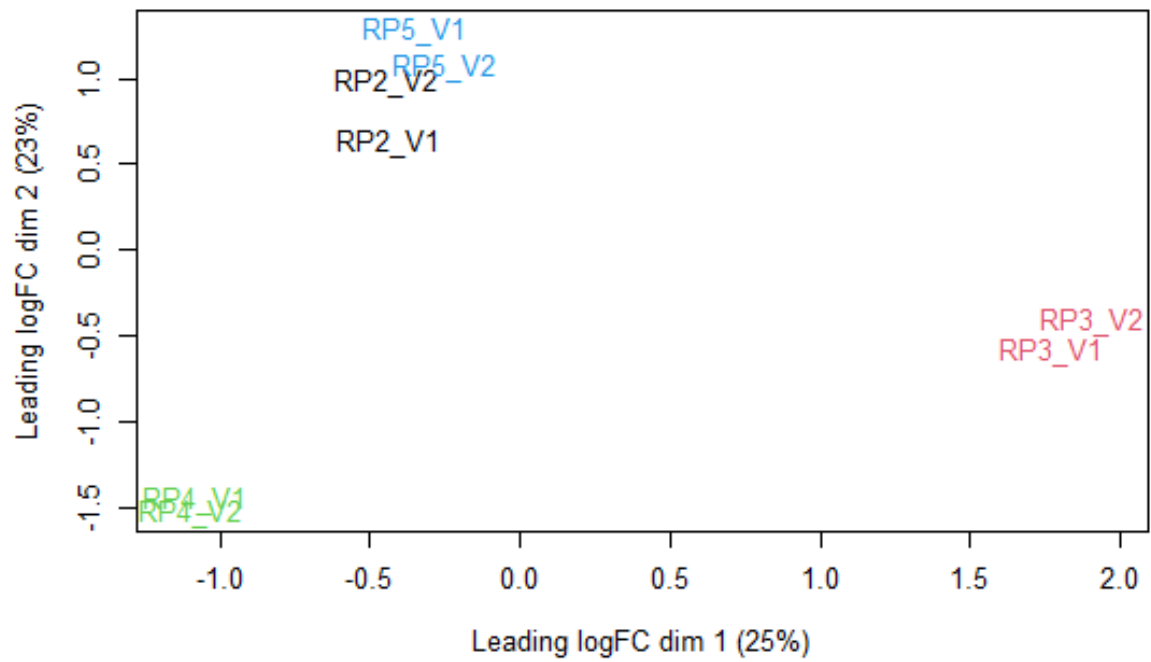

**Additional File 1 Figure 4a.** MDS Plot of blood samples (n=8) sequenced at the University of Brighton with standard chemistry reagents from Returning Participant (RP2-5) first and second visits (\_V1 or \_V2).

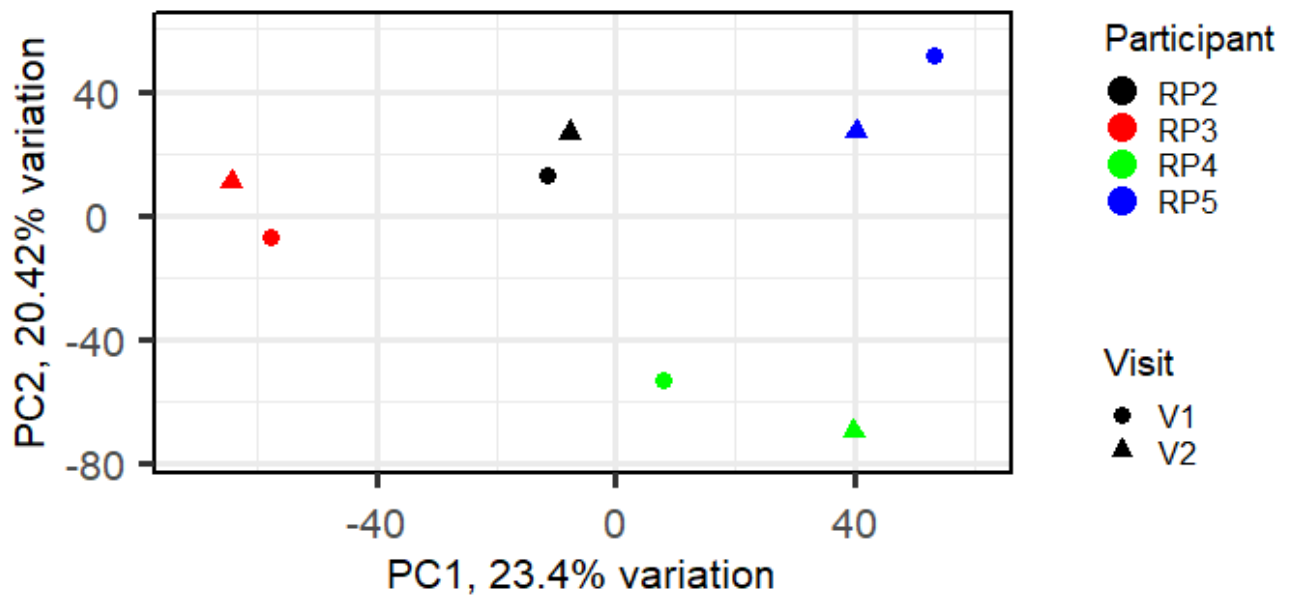

**Additional File 1 Figure 4b.** PCA Plot of blood samples (n=8) sequenced at the University of Brighton with standard chemistry reagents from Returning Participant (RP2-5) first and second visits (V1 or V2).



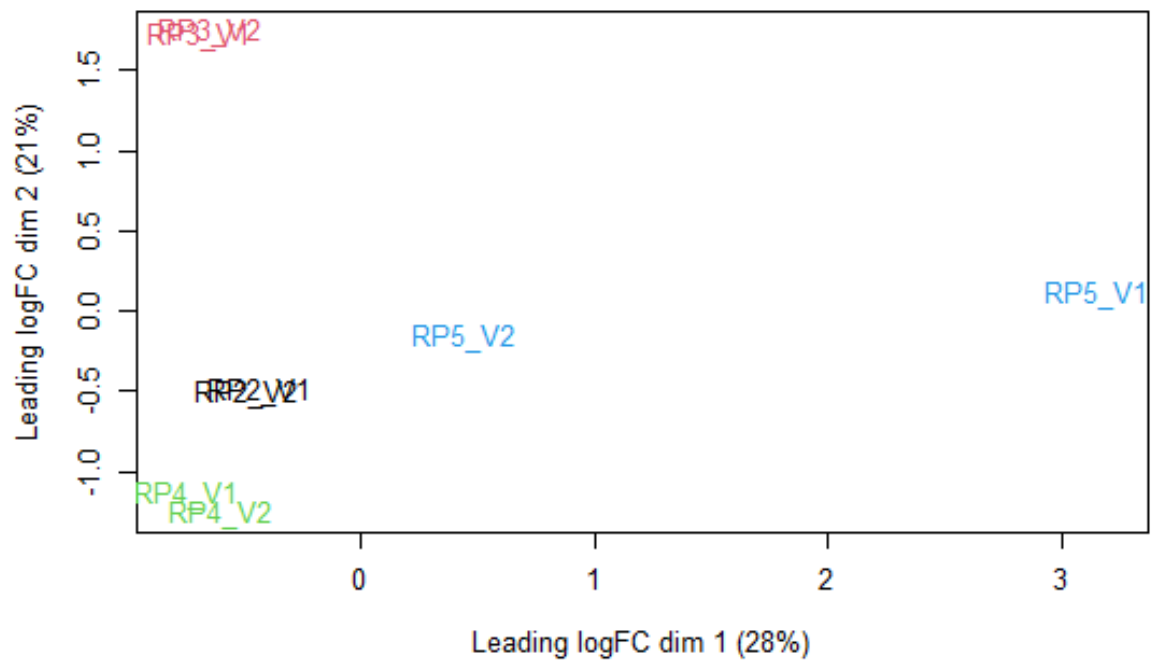

**Additional File 1 Figure 5a.** MDS Plot of blood samples (n=8) sequenced at MGI with standard chemistry reagents from Returning Participant (RP2-5) first and second visits (\_V1 or \_V2).

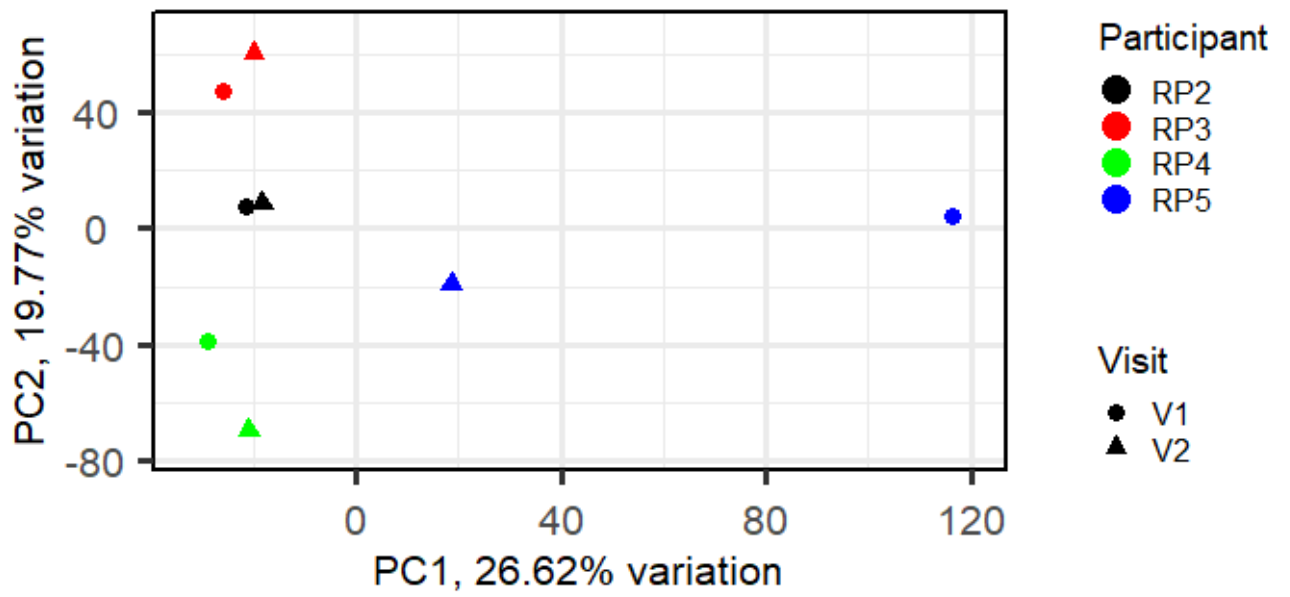

**Additional File 1 Figure 5b.** PCA Plot of blood samples (n=8) sequenced at MGI with standard chemistry reagents from Returning Participant (RP2-5) first and second visits (V1 or V2).

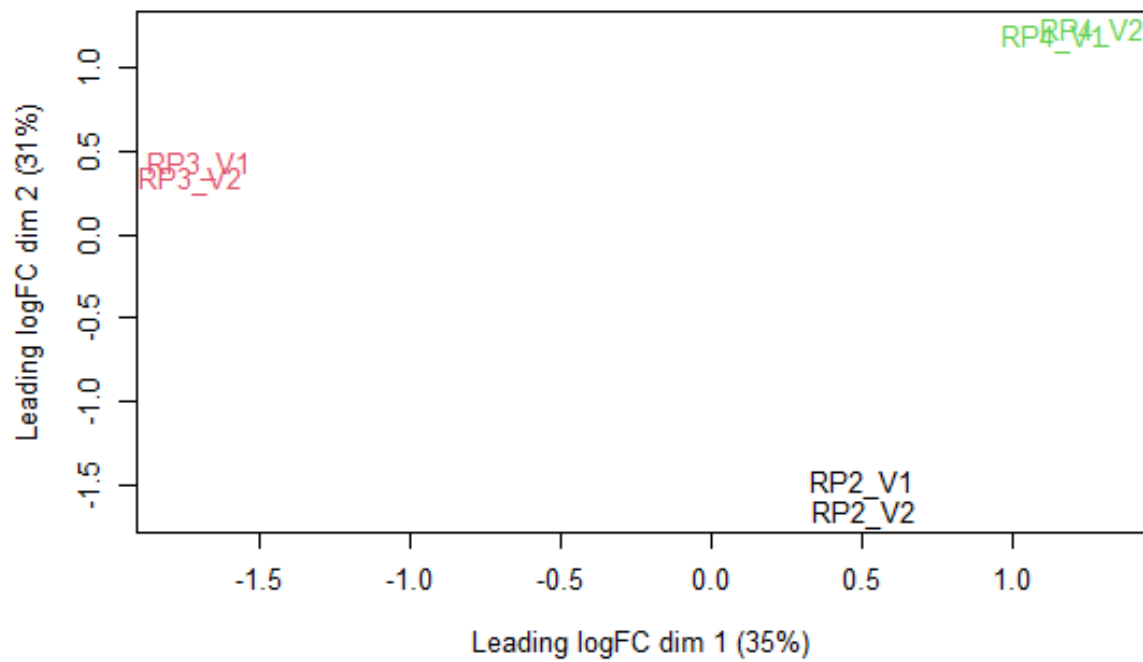

**Additional File 1 Figure 6a.** MDS Plot of blood samples (n=6) sequenced at MGI with standard chemistry reagents that underwent differential gene expression analysis from Returning Participant (RP2-4) first and second visits (\_V1 or \_V2).

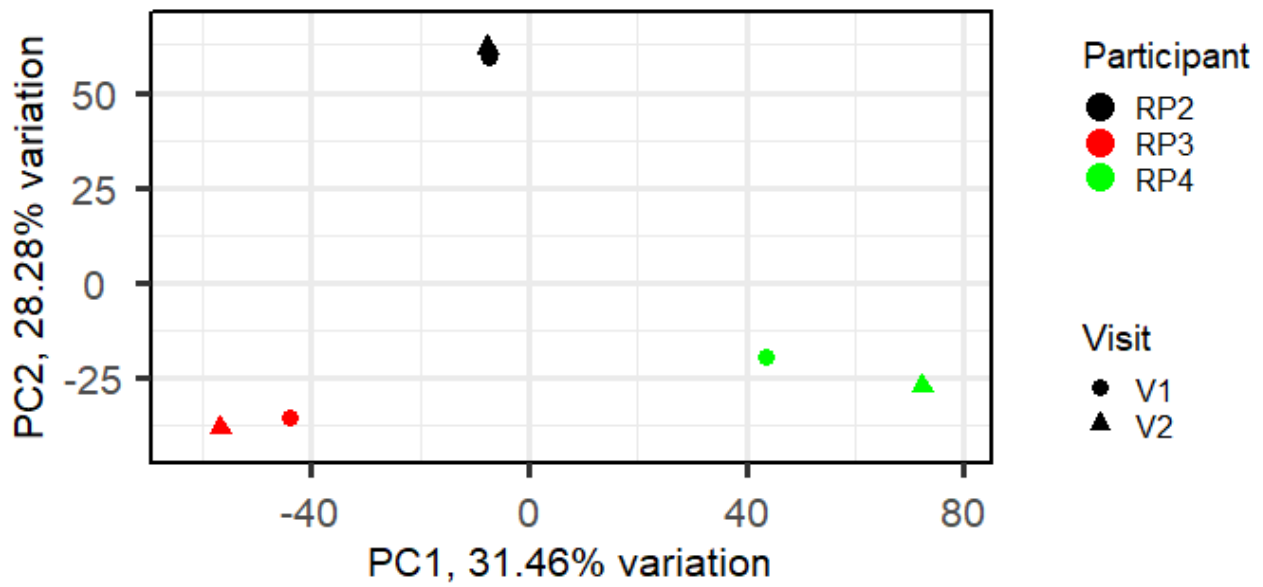

**Additional File 1 Figure 6b.** PCA Plot of blood samples (n=6) sequenced at MGI with standard chemistry reagents that underwent differential gene expression analysis from Returning Participant (RP2-4) first and second visits (V1 or V2).

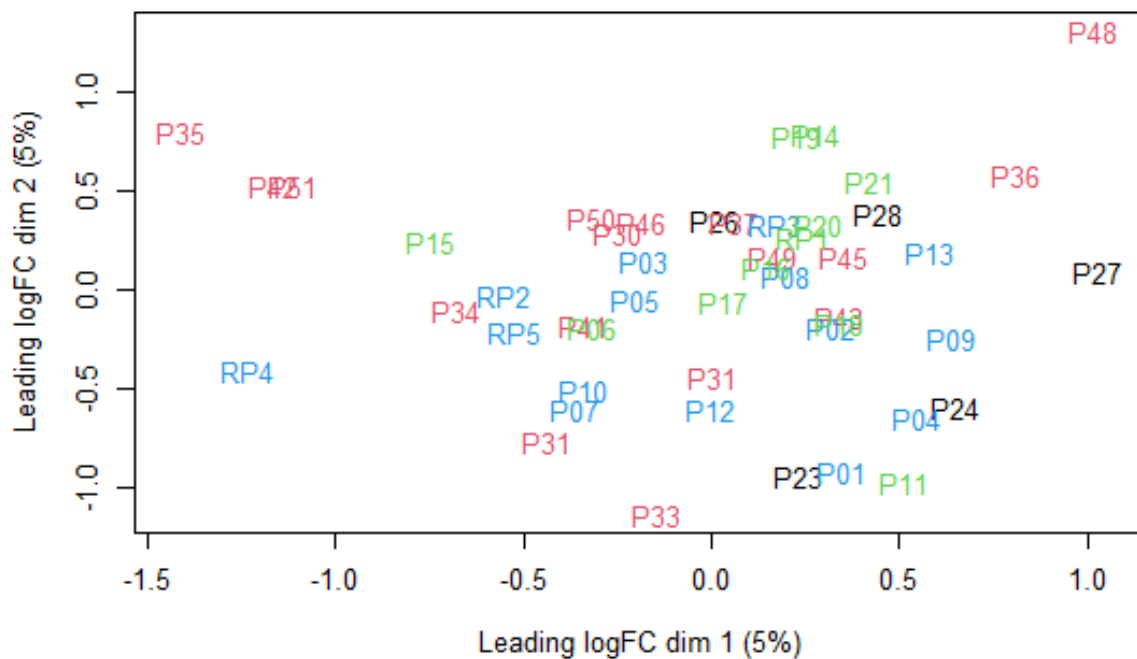

**Additional File 1 Figure 7a.** MDS Plot of muscle samples (n=48) to be used in group comparisons sequenced with MGI standard chemistry reagents at MGI from Group C (black, n=5), Group RT (red, n=17), Group RT-AS  $\leq 2$  (blue, n=15) and Group RT-AS  $\geq 10$  (green, n=11) subjected to Differential Gene Expression analysis.

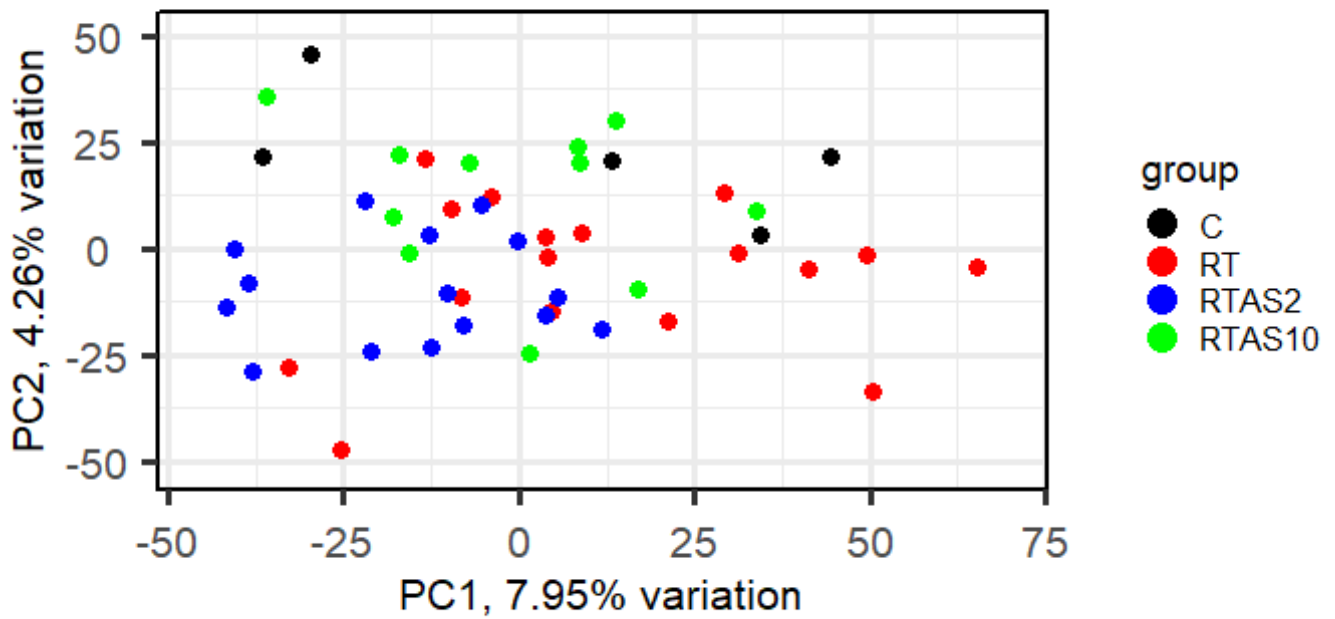

**Additional File 1 Figure 7b.** PCA Plot of muscle samples (n=48) to be used in group comparisons sequenced with MGI standard chemistry reagents at MGI from Group C (n=5), Group RT (n=17), Group RT-AS  $\leq 2$  (n=15) and Group RT-AS  $\geq 10$  (n=11) subjected to Differential Gene Expression analysis.

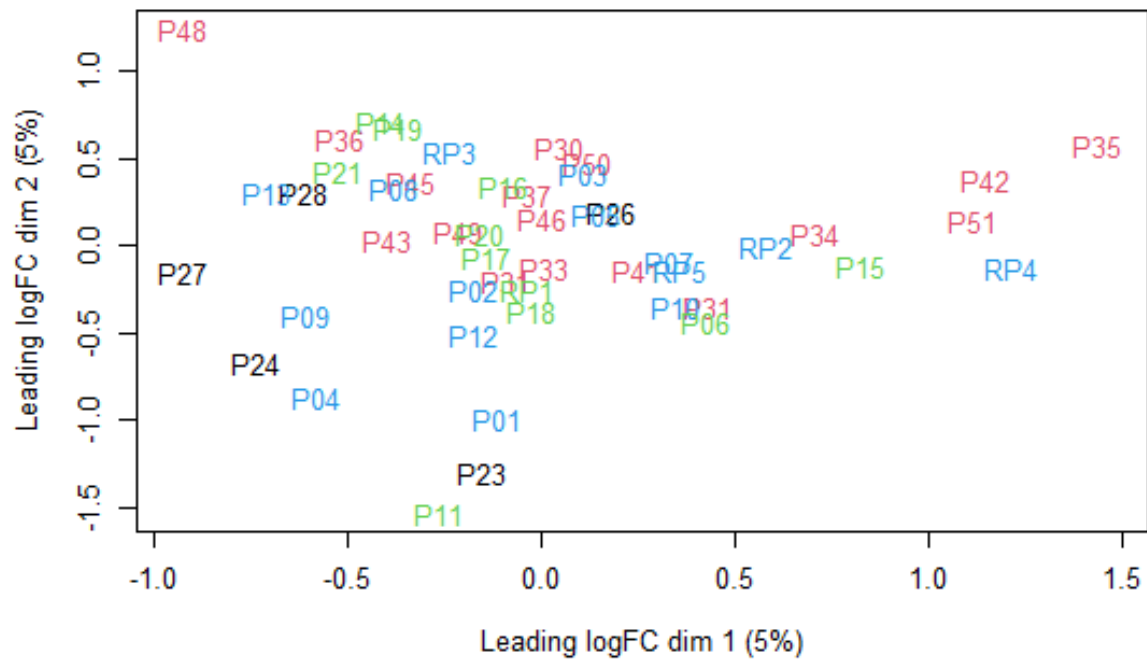

**Additional File 1 Figure 8a.** MDS Plot of muscle samples (n=48) to be used in group comparisons sequenced with CoolMPS reagents at MGI from Group C (black, n=5), Group RT (red, n=17), Group RT-AS  $\leq 2$  (blue, n=15) and Group RT-AS  $\geq 10$  (green, n=11) subjected to Differential Gene Expression analysis.

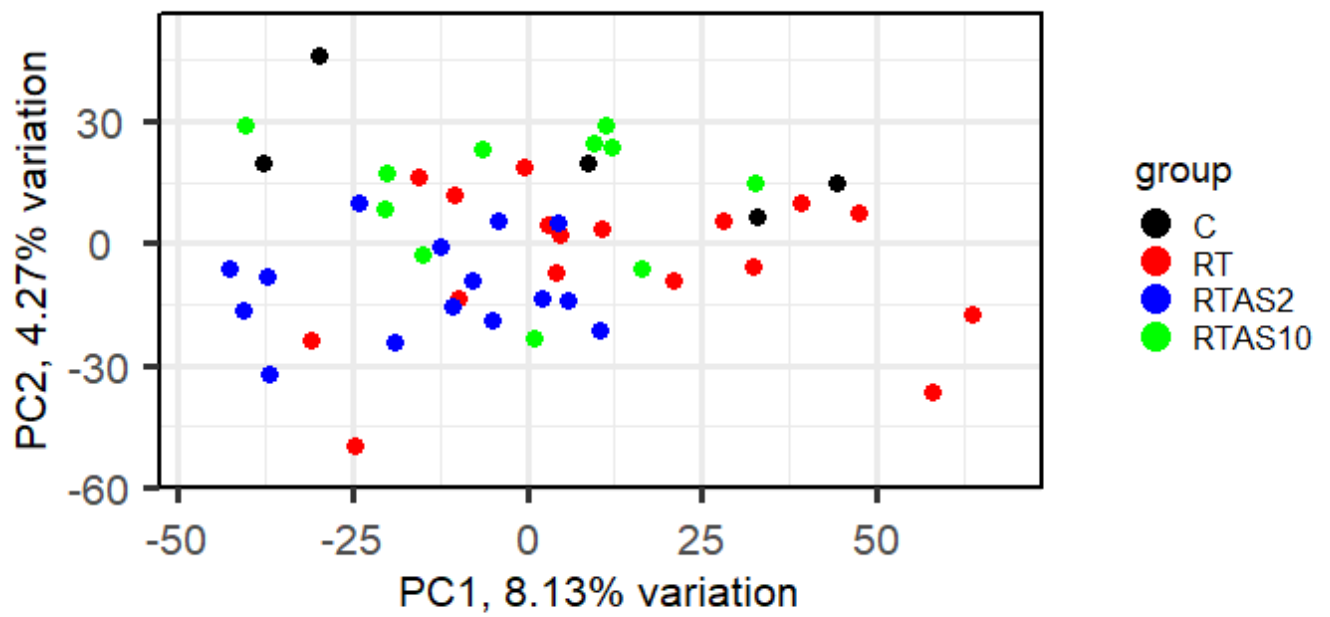

**Additional File 1 Figure 8b.** PCA Plot of muscle samples (n=48) to be used in group comparisons sequenced with CoolMPS reagents at MGI from Group C (n=5), Group RT (n=17), Group RT-AS  $\leq 2$  (n=15) and Group RT-AS  $\geq 10$  (n=11) subjected to Differential Gene Expression analysis.



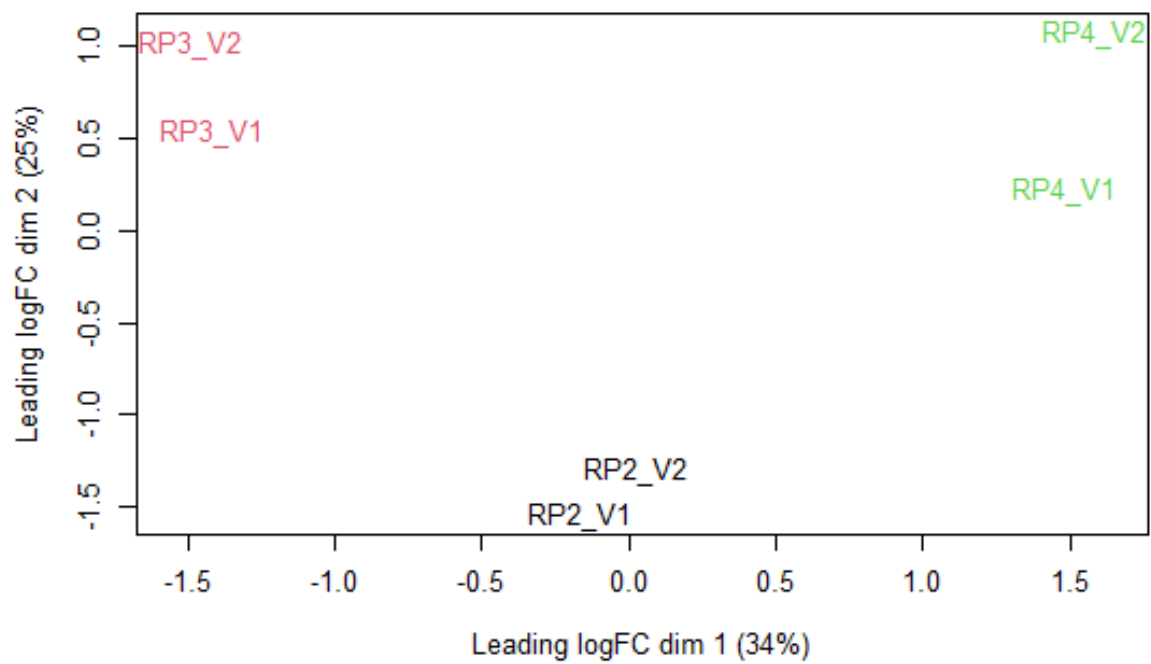

**Additional File 1 Figure 9a.** MDS Plot of muscle samples (n=6) sequenced with Standard MGI reagents at MGI from Returning Participant (RP2-4) first and second visits (\_V1 or \_V2).

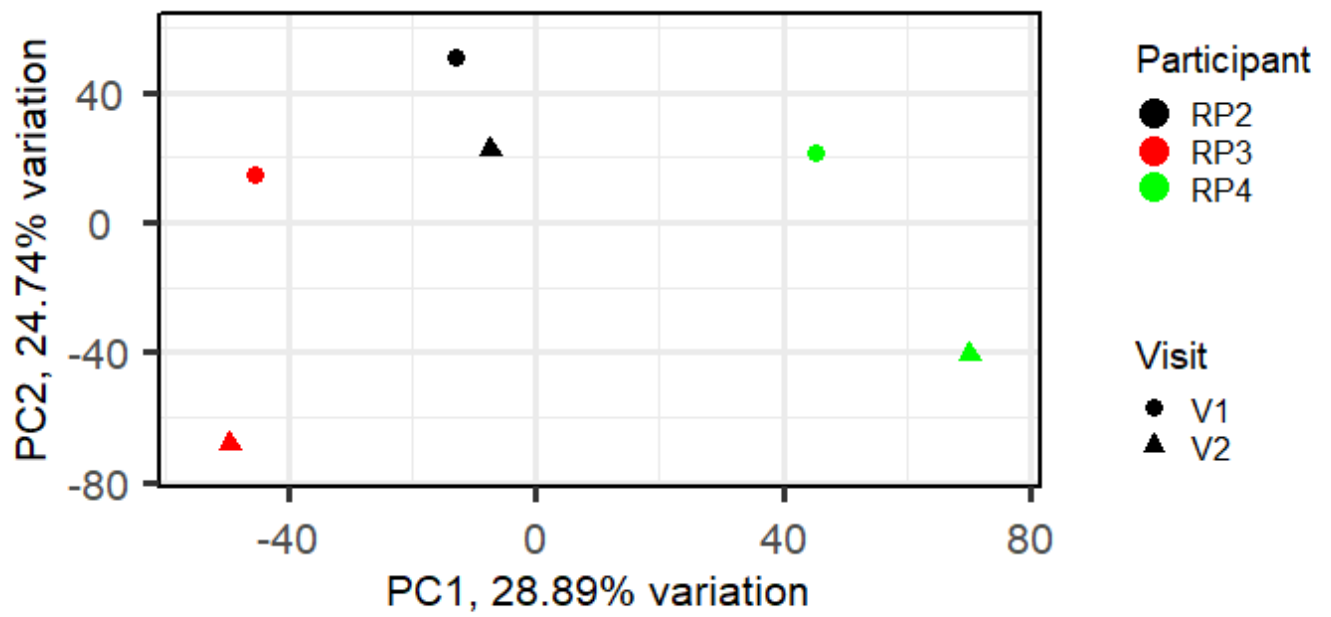

**Additional File 1 Figure 9b.** PCA Plot of muscle samples (n=6) sequenced with Standard MGI reagents at MGI from Returning Participant (RP2-4) first and second visits (V1 or V2).

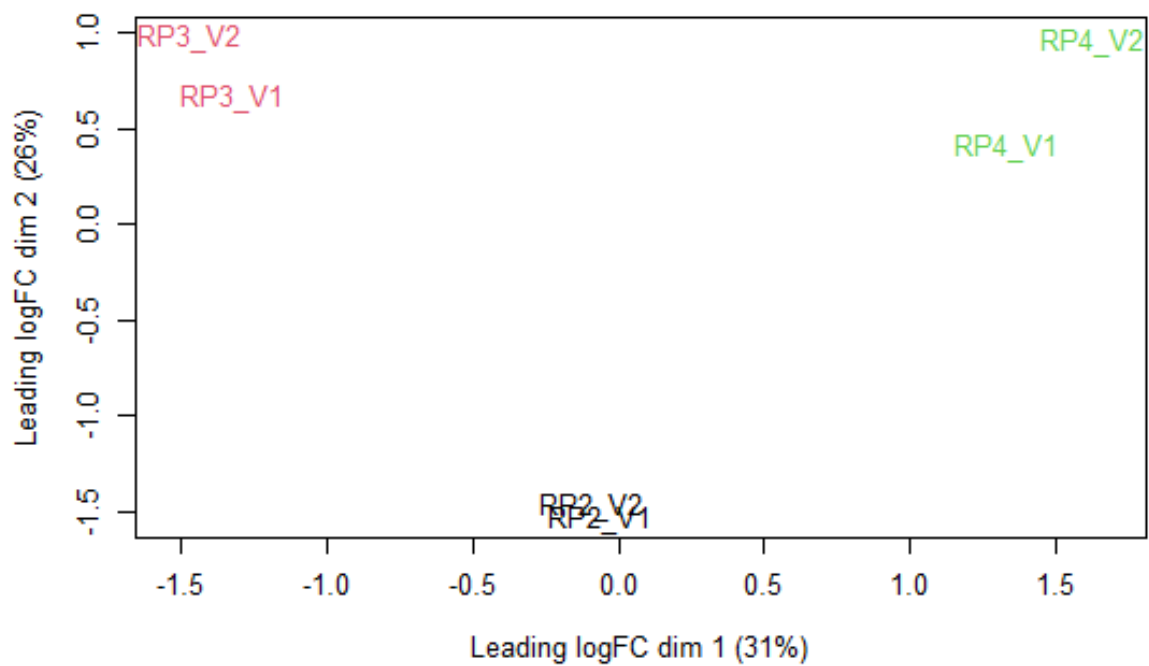

**Additional File 1 Figure 10a.** MDS Plot of muscle samples (n=6) sequenced with CoolMPS reagents at MGI from Returning Participant (RP2-4) first and second visits (\_V1 or \_V2).

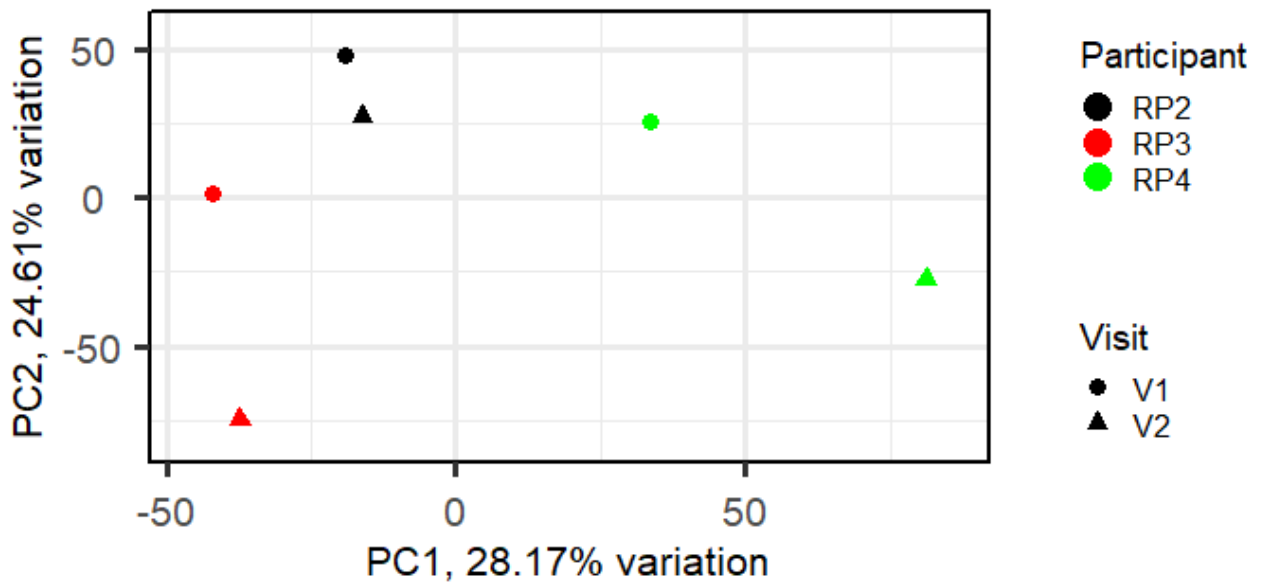

**Additional File 1 Figure 10b.** PCA Plot of muscle samples (n=6) sequenced with CoolMPS reagents at MGI from Returning Participant (RP2-4) first and second visits (V1 or V2).

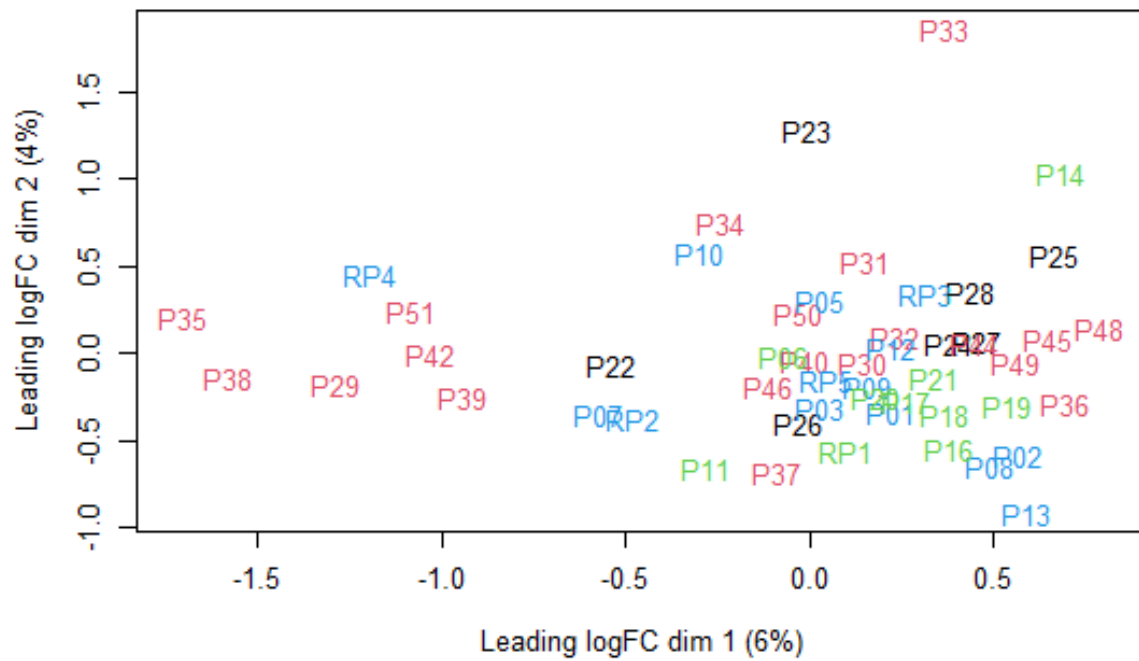

**Additional File 1 Figure 11a.** MDS Plot of blood samples (n=51) sequenced at the University of Brighton with standard chemistry reagents that underwent differential gene expression analysis. Group C (black, n=7), Group RT (red, n=20), Group RT-AS  $\leq 2$  (blue, n=14) and Group RT-AS  $\geq 10$  (green, n=10).

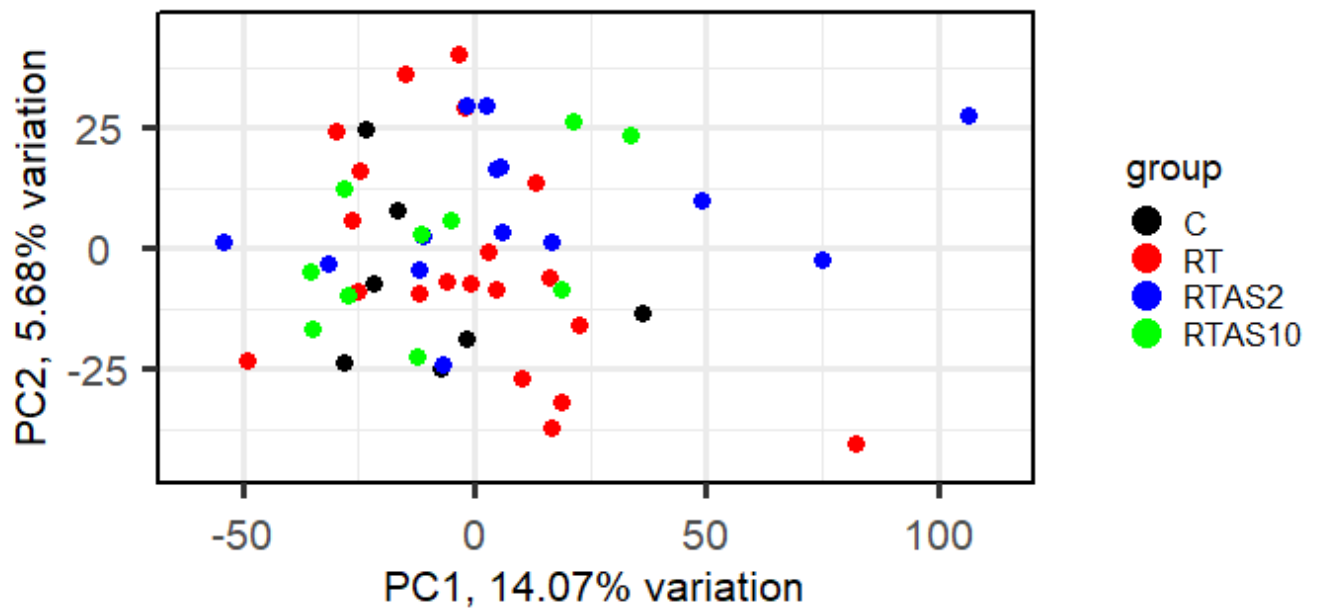

**Additional File 1 Figure 11b.** MDS Plot of blood samples (n=51) sequenced at the University of Brighton with standard chemistry reagents that underwent differential gene expression analysis. Group C (n=7), Group RT (n=20), Group RT-AS  $\leq 2$  (n=14) and Group RT-AS  $\geq 10$  (n=10).

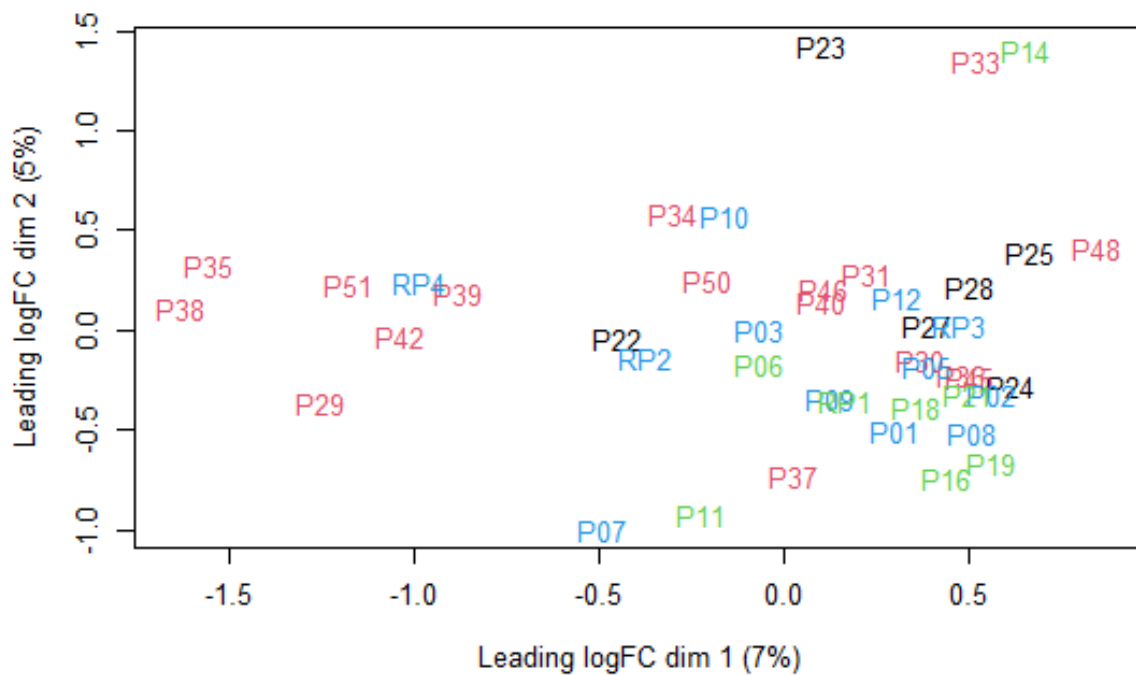

**Additional File 1 Figure 12a.** MDS Plot of blood samples (n=43) sequenced at MGI with standard chemistry reagents that underwent differential gene expression analysis: Group C (black, n=6), Group RT (red, n=17), Group RT-AS  $\leq 2$  (blue, n=12) and Group RT-AS  $\geq 10$  (green, n=8).

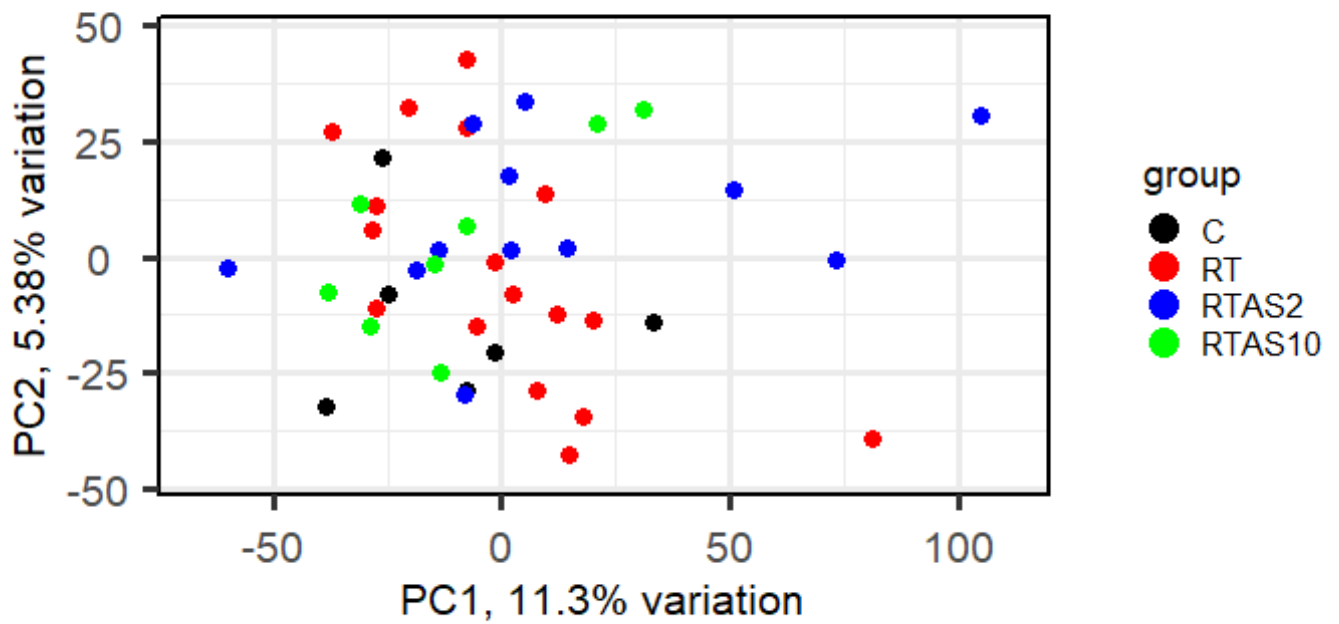

**Additional File 1 Figure 12b.** PCA Plot of blood samples (n=43) sequenced at MGI with standard chemistry reagents that underwent differential gene expression analysis: Group C (n=6), Group RT (n=17), Group RT-AS  $\leq 2$  (n=12) and Group RT-AS  $\geq 10$  (n=8).
