# Supplementary material for: An observational human study investigating the effect of anabolic androgenic steroid use on the transcriptome of skeletal muscle and whole blood using RNA-Seq
Source: PubMed Central journal article supplement (PMC10157927; doi:10.1186/s12920-023-01512-z), 2023-05-03
Supplement: 12920_2023_1512_MOESM2_ESM.pdf [file 12920_2023_1512_MOESM2_ESM.pdf]

**Additional File 2**

| <b>Sample</b> | <b>Group</b> | <b>Sequencing Location &amp; Chemistry</b> | <b>Aligned Reads (Million)</b> | <b>Overall Alignment Rate %</b> |
|---------------|--------------|--------------------------------------------|--------------------------------|---------------------------------|
| RP1_V1        | RT-AS>10     | UoB Standard                               | 71.5                           | 97.4                            |
| RP2_V1        | RT-AS≤2      | UoB Standard                               | 72.7                           | 97.3                            |
| RP2_V2        | RP Visit 2   | UoB Standard                               | 40.1                           | 96.6                            |
| RP3_V1        | RT-AS≤2      | UoB Standard                               | 57.6                           | 97.5                            |
| RP3_V2        | RP Visit 2   | UoB Standard                               | 44.5                           | 97.3                            |
| RP4_V1        | RT-AS≤2      | UoB Standard                               | 86.9                           | 97.1                            |
| RP4_V2        | RP Visit 2   | UoB Standard                               | 56.5                           | 97.3                            |
| RP5_V1        | RT-AS≤2      | UoB Standard                               | 54.8                           | 94.8                            |
| RP5_V2        | RP Visit 2   | UoB Standard                               | 70.1                           | 97.3                            |
| P01           | RT-AS≤2      | UoB Standard                               | 42.6                           | 96.3                            |
| P02           | RT-AS≤2      | UoB Standard                               | 57.5                           | 97.0                            |
| P03           | RT-AS≤2      | UoB Standard                               | 67.6                           | 97.3                            |
| P05           | RT-AS≤2      | UoB Standard                               | 41.4                           | 97.2                            |
| P07           | RT-AS≤2      | UoB Standard                               | 46.9                           | 97.2                            |
| P08           | RT-AS≤2      | UoB Standard                               | 53.9                           | 97.5                            |
| P09           | RT-AS≤2      | UoB Standard                               | 56.9                           | 95.0                            |
| P10           | RT-AS≤2      | UoB Standard                               | 59.0                           | 97.4                            |
| P12           | RT-AS≤2      | UoB Standard                               | 110.6                          | 97.7                            |
| P13           | RT-AS≤2      | UoB Standard                               | 44.5                           | 93.2                            |
| P06           | RT-AS>10     | UoB Standard                               | 65.4                           | 96.9                            |
| P11           | RT-AS>10     | UoB Standard                               | 51.1                           | 97.2                            |
| P14           | RT-AS>10     | UoB Standard                               | 78.0                           | 97.0                            |
| P16           | RT-AS>10     | UoB Standard                               | 64.3                           | 97.3                            |
| P17           | RT-AS>10     | UoB Standard                               | 62.2                           | 96.5                            |
| P18           | RT-AS>10     | UoB Standard                               | 55.2                           | 96.9                            |
| P19           | RT-AS>10     | UoB Standard                               | 77.7                           | 96.9                            |
| P20           | RT-AS>10     | UoB Standard                               | 48.3                           | 93.5                            |
| P21           | RT-AS>10     | UoB Standard                               | 61.7                           | 97.3                            |
| P22           | C            | UoB Standard                               | 66.4                           | 97.4                            |
| P23           | C            | UoB Standard                               | 51.3                           | 96.1                            |
| P24           | C            | UoB Standard                               | 48.4                           | 97.2                            |
| P25           | C            | UoB Standard                               | 70.2                           | 97.2                            |
| P26           | C            | UoB Standard                               | 36.1                           | 96.6                            |
| P27           | C            | UoB Standard                               | 68.5                           | 97.1                            |
| P28           | C            | UoB Standard                               | 43.1                           | 96.9                            |
| P29           | RT           | UoB Standard                               | 88.0                           | 97.2                            |
| P30           | RT           | UoB Standard                               | 90.8                           | 97.1                            |
| P31           | RT           | UoB Standard                               | 58.2                           | 96.6                            |
| P32           | RT           | UoB Standard                               | 54.7                           | 97.4                            |
| P33           | RT           | UoB Standard                               | 45.2                           | 96.9                            |
| P34           | RT           | UoB Standard                               | 44.3                           | 95.5                            |
| P35           | RT           | UoB Standard                               | 33.2                           | 94.7                            |

|                     |    |              |             |            |
|---------------------|----|--------------|-------------|------------|
| P36                 | RT | UoB Standard | 41.5        | 92.1       |
| P37                 | RT | UoB Standard | 55.1        | 95.8       |
| P38                 | RT | UoB Standard | 65.0        | 97.1       |
| P39                 | RT | UoB Standard | 51.0        | 95.2       |
| P40                 | RT | UoB Standard | 67.6        | 97.6       |
| P42                 | RT | UoB Standard | 90.5        | 97.6       |
| P44                 | RT | UoB Standard | 52.9        | 96.5       |
| P45                 | RT | UoB Standard | 42.5        | 96.9       |
| P46                 | RT | UoB Standard | 65.3        | 97.3       |
| P48                 | RT | UoB Standard | 58.8        | 96.9       |
| P49                 | RT | UoB Standard | 74.6        | 96.6       |
| P50                 | RT | UoB Standard | 56.9        | 97.3       |
| P51                 | RT | UoB Standard | 51.3        | 94.8       |
| <b>Average ± SD</b> |    |              | 59.5 ± 15.4 | 96.6 ± 1.2 |

**Additional File 2 Table 1.** HISAT2 alignment against the reference genome assembly (GRCh38.p5) with Ensemble 84 annotation utilising the publicly available grch38\_tran pre-built HISAT index showing total aligned reads in million and overall alignment rate % for whole blood samples (n=55) sequenced at the University of Brighton (UoB) using standard reagents used in downstream DGE/GSEA analyses. RP: Returning Participant; \_V1 or \_V2: RP Visit 1 or 2; C: Control; RT: Resistance Trained; RT-AS $\leq$ 2: RT Exposed to AAS  $\leq$ 2 weeks before sampling; RT-AS $>$ 10: RT Exposed to AAS  $>$ 10 weeks before sampling.

| <b>Sample</b> | <b>Group</b> | <b>Sequencing Location &amp; Chemistry</b> | <b>Aligned Reads (Million)</b> | <b>Overall Alignment Rate %</b> |
|---------------|--------------|--------------------------------------------|--------------------------------|---------------------------------|
| RP1_V1        | RT-AS>10     | MGI Standard                               | 61.8                           | 97.1                            |
| RP2_V1        | RT-AS≤2      | MGI Standard                               | 62.9                           | 95.9                            |
| RP2_V2        | RP Visit 2   | MGI Standard                               | 44.0                           | 95.3                            |
| RP3_V1        | RT-AS≤2      | MGI Standard                               | 63.9                           | 97.3                            |
| RP3_V2        | RP Visit 2   | MGI Standard                               | 49.9                           | 95.1                            |
| RP4_V1        | RT-AS≤2      | MGI Standard                               | 58.5                           | 96.8                            |
| RP4_V2        | RP Visit 2   | MGI Standard                               | 58.4                           | 96.9                            |
| P01           | RT-AS≤2      | MGI Standard                               | 47.7                           | 95.9                            |
| P02           | RT-AS≤2      | MGI Standard                               | 54.3                           | 96.7                            |
| P03           | RT-AS≤2      | MGI Standard                               | 58.2                           | 97.0                            |
| P05           | RT-AS≤2      | MGI Standard                               | 49.5                           | 96.8                            |
| P07           | RT-AS≤2      | MGI Standard                               | 60.0                           | 95.9                            |
| P08           | RT-AS≤2      | MGI Standard                               | 69.1                           | 95.5                            |
| P09           | RT-AS≤2      | MGI Standard                               | 55.2                           | 91.4                            |
| P10           | RT-AS≤2      | MGI Standard                               | 73.2                           | 95.1                            |
| P12           | RT-AS≤2      | MGI Standard                               | 86.5                           | 95.5                            |
| P06           | RT-AS>10     | MGI Standard                               | 54.2                           | 96.6                            |
| P11           | RT-AS>10     | MGI Standard                               | 50.9                           | 95.7                            |
| P14           | RT-AS>10     | MGI Standard                               | 87.9                           | 96.7                            |
| P16           | RT-AS>10     | MGI Standard                               | 59.2                           | 95.6                            |
| P18           | RT-AS>10     | MGI Standard                               | 74.4                           | 95.3                            |
| P19           | RT-AS>10     | MGI Standard                               | 51.7                           | 96.5                            |
| P21           | RT-AS>10     | MGI Standard                               | 60.3                           | 95.5                            |
| P22           | C            | MGI Standard                               | 68.3                           | 97.2                            |
| P23           | C            | MGI Standard                               | 55.8                           | 95.9                            |
| P24           | C            | MGI Standard                               | 47.6                           | 95.9                            |
| P25           | C            | MGI Standard                               | 63.5                           | 96.7                            |
| P27           | C            | MGI Standard                               | 56.0                           | 95.9                            |
| P28           | C            | MGI Standard                               | 45.6                           | 96.8                            |
| P29           | RT           | MGI Standard                               | 74.6                           | 96.9                            |
| P30           | RT           | MGI Standard                               | 77.9                           | 96.8                            |
| P31           | RT           | MGI Standard                               | 61.6                           | 96.2                            |
| P33           | RT           | MGI Standard                               | 51.0                           | 95.5                            |
| P34           | RT           | MGI Standard                               | 52.8                           | 93.1                            |
| P35           | RT           | MGI Standard                               | 41.0                           | 91.6                            |
| P36           | RT           | MGI Standard                               | 50.0                           | 88.1                            |
| P37           | RT           | MGI Standard                               | 59.1                           | 93.0                            |
| P38           | RT           | MGI Standard                               | 67.0                           | 94.8                            |
| P39           | RT           | MGI Standard                               | 50.5                           | 92.3                            |
| P40           | RT           | MGI Standard                               | 76.4                           | 95.6                            |
| P42           | RT           | MGI Standard                               | 69.4                           | 95.7                            |
| P45           | RT           | MGI Standard                               | 64.6                           | 96.4                            |
| P46           | RT           | MGI Standard                               | 51.3                           | 97.1                            |
| P48           | RT           | MGI Standard                               | 83.9                           | 94.0                            |
| P50           | RT           | MGI Standard                               | 47.6                           | 95.1                            |

|                                    |    |              |                 |                |
|------------------------------------|----|--------------|-----------------|----------------|
| P51                                | RT | MGI Standard | 48.2            | 91.9           |
| <b>Average <math>\pm</math> SD</b> |    |              | 59.9 $\pm$ 11.5 | 95.4 $\pm$ 1.9 |

**Additional File 2 Table 2.** HISAT2 alignment against the reference genome assembly (GRCh38.p5) with Ensemble 84 annotation utilising the publicly available grch38\_tran pre-built HISAT index showing total aligned reads in million and overall alignment rate % for whole blood samples (n=46) sequenced by MGI, Latvia using standard reagents used in downstream DGE/GSEA analyses. RP: Returning Participant; \_V1 or \_V2: RP Visit 1 or 2; C: Control; RT: Resistance Trained; RT-AS $\leq$ 2: RT Exposed to AAS  $\leq$ 2 weeks before sampling; RT-AS>10: RT Exposed to AAS >10 weeks before sampling.

| Sample | Group      | Sequencing Location & Chemistry | Aligned Reads (Million) | Overall Alignment Rate % |
|--------|------------|---------------------------------|-------------------------|--------------------------|
| RP1_V1 | RT-AS>10   | MGI Standard                    | 50.6                    | 97.0                     |
| RP2_V1 | RT-AS≤2    | MGI Standard                    | 64.6                    | 96.3                     |
| RP2_V2 | RP Visit 2 | MGI Standard                    | 86.5                    | 95.8                     |
| RP3_V1 | RT-AS≤2    | MGI Standard                    | 55.1                    | 96.9                     |
| RP3_V2 | RP Visit 2 | MGI Standard                    | 71.0                    | 93.4                     |
| RP4_V1 | RT-AS≤2    | MGI Standard                    | 75.6                    | 94.6                     |
| RP4_V2 | RP Visit 2 | MGI Standard                    | 67.8                    | 91.9                     |
| RP5_V1 | RT-AS≤2    | MGI Standard                    | 84.9                    | 94.2                     |
| P01    | RT-AS≤2    | MGI Standard                    | 83.8                    | 94.2                     |
| P02    | RT-AS≤2    | MGI Standard                    | 71.8                    | 94.6                     |
| P03    | RT-AS≤2    | MGI Standard                    | 64.1                    | 94.1                     |
| P04    | RT-AS≤2    | MGI Standard                    | 80.2                    | 96.5                     |
| P05    | RT-AS≤2    | MGI Standard                    | 80.0                    | 94.6                     |
| P07    | RT-AS≤2    | MGI Standard                    | 59.7                    | 97.3                     |
| P08    | RT-AS≤2    | MGI Standard                    | 71.3                    | 93.7                     |
| P09    | RT-AS≤2    | MGI Standard                    | 78.2                    | 93.9                     |
| P10    | RT-AS≤2    | MGI Standard                    | 57.2                    | 93.7                     |
| P12    | RT-AS≤2    | MGI Standard                    | 56.2                    | 97.1                     |
| P13    | RT-AS≤2    | MGI Standard                    | 113.7                   | 96.3                     |
| P06    | RT-AS>10   | MGI Standard                    | 60.8                    | 97.3                     |
| P11    | RT-AS>10   | MGI Standard                    | 70.8                    | 96.7                     |
| P14    | RT-AS>10   | MGI Standard                    | 74.8                    | 94.5                     |
| P15    | RT-AS>10   | MGI Standard                    | 77.7                    | 93.3                     |
| P16    | RT-AS>10   | MGI Standard                    | 83.2                    | 93.2                     |
| P17    | RT-AS>10   | MGI Standard                    | 66.1                    | 96.8                     |
| P18    | RT-AS>10   | MGI Standard                    | 71.5                    | 96.8                     |
| P19    | RT-AS>10   | MGI Standard                    | 57.9                    | 97.0                     |
| P20    | RT-AS>10   | MGI Standard                    | 71.8                    | 96.3                     |
| P21    | RT-AS>10   | MGI Standard                    | 67.9                    | 97.0                     |
| P23    | C          | MGI Standard                    | 70.6                    | 96.9                     |
| P24    | C          | MGI Standard                    | 72.0                    | 95.6                     |
| P26    | C          | MGI Standard                    | 68.2                    | 92.1                     |
| P27    | C          | MGI Standard                    | 56.0                    | 96.6                     |
| P28    | C          | MGI Standard                    | 40.6                    | 97.5                     |
| P30    | RT         | MGI Standard                    | 57.1                    | 95.3                     |
| P31    | RT         | MGI Standard                    | 55.4                    | 97.4                     |
| P32    | RT         | MGI Standard                    | 56.2                    | 96.9                     |
| P33    | RT         | MGI Standard                    | 65.6                    | 96.6                     |
| P34    | RT         | MGI Standard                    | 73.0                    | 95.4                     |
| P35    | RT         | MGI Standard                    | 56.4                    | 97.5                     |
| P36    | RT         | MGI Standard                    | 71.1                    | 93.3                     |
| P37    | RT         | MGI Standard                    | 97.4                    | 91.8                     |
| P41    | RT         | MGI Standard                    | 79.4                    | 93.8                     |
| P42    | RT         | MGI Standard                    | 60.8                    | 97.4                     |
| P43    | RT         | MGI Standard                    | 73.8                    | 94.2                     |

|                     |    |              |                    |                   |
|---------------------|----|--------------|--------------------|-------------------|
| P45                 | RT | MGI Standard | 71.1               | 96.8              |
| P46                 | RT | MGI Standard | 70.1               | 94.5              |
| P48                 | RT | MGI Standard | 59.3               | 93.6              |
| P49                 | RT | MGI Standard | 70.9               | 93.7              |
| P50                 | RT | MGI Standard | 67.0               | 96.0              |
| P51                 | RT | MGI Standard | 66.8               | 94.3              |
| <b>Average ± SD</b> |    |              | <b>69.3 ± 12.2</b> | <b>95.3 ± 1.7</b> |

**Additional File 2 Table 3.** HISAT2 alignment against the reference genome assembly (GRCh38.p5) with Ensemble 84 annotation utilising the publicly available grch38\_tran pre-built HISAT index showing total aligned reads in million and overall alignment rate % for muscle samples (n=51) sequenced by MGI, Latvia using standard reagents used in downstream DGE/GSEA analyses. RP: Returning Participant; \_V1 or \_V2: RP Visit 1 or 2; C: Control; RT: Resistance Trained; RT-AS $\leq$ 2: RT Exposed to AAS  $\leq$ 2 weeks before sampling; RT-AS $>$ 10: RT Exposed to AAS  $>$ 10 weeks before sampling.

| Sample | Group      | Sequencing Location & Chemistry | Aligned Reads (Million) | Overall Alignment Rate % |
|--------|------------|---------------------------------|-------------------------|--------------------------|
| RP1_V1 | RT-AS>10   | MGI CoolMPS                     | 54.8                    | 98.2                     |
| RP2_V1 | RT-AS≤2    | MGI CoolMPS                     | 64.6                    | 98.8                     |
| RP2_V2 | RP Visit 2 | MGI CoolMPS                     | 71.9                    | 98.8                     |
| RP3_V1 | RT-AS≤2    | MGI CoolMPS                     | 60.5                    | 98.3                     |
| RP3_V2 | RP Visit 2 | MGI CoolMPS                     | 78.2                    | 97.9                     |
| RP4_V1 | RT-AS≤2    | MGI CoolMPS                     | 84.9                    | 98.8                     |
| RP4_V2 | RP Visit 2 | MGI CoolMPS                     | 58.8                    | 96.8                     |
| RP5_V1 | RT-AS≤2    | MGI CoolMPS                     | 80.1                    | 98.7                     |
| P01    | RT-AS≤2    | MGI CoolMPS                     | 70.2                    | 98.3                     |
| P02    | RT-AS≤2    | MGI CoolMPS                     | 73.8                    | 98.9                     |
| P03    | RT-AS≤2    | MGI CoolMPS                     | 75.0                    | 98.4                     |
| P04    | RT-AS≤2    | MGI CoolMPS                     | 90.2                    | 98.3                     |
| P05    | RT-AS≤2    | MGI CoolMPS                     | 82.9                    | 98.8                     |
| P07    | RT-AS≤2    | MGI CoolMPS                     | 62.5                    | 98.8                     |
| P08    | RT-AS≤2    | MGI CoolMPS                     | 73.7                    | 98.5                     |
| P09    | RT-AS≤2    | MGI CoolMPS                     | 77.2                    | 98.7                     |
| P10    | RT-AS≤2    | MGI CoolMPS                     | 60.3                    | 98.8                     |
| P12    | RT-AS≤2    | MGI CoolMPS                     | 57.8                    | 98.6                     |
| P13    | RT-AS≤2    | MGI CoolMPS                     | 72.1                    | 98.9                     |
| P06    | RT-AS>10   | MGI CoolMPS                     | 64.9                    | 98.3                     |
| P11    | RT-AS>10   | MGI CoolMPS                     | 79.2                    | 98.3                     |
| P14    | RT-AS>10   | MGI CoolMPS                     | 79.2                    | 98.0                     |
| P15    | RT-AS>10   | MGI CoolMPS                     | 79.2                    | 97.8                     |
| P16    | RT-AS>10   | MGI CoolMPS                     | 86.6                    | 98.7                     |
| P17    | RT-AS>10   | MGI CoolMPS                     | 73.0                    | 98.4                     |
| P18    | RT-AS>10   | MGI CoolMPS                     | 79.2                    | 98.5                     |
| P19    | RT-AS>10   | MGI CoolMPS                     | 59.5                    | 98.7                     |
| P20    | RT-AS>10   | MGI CoolMPS                     | 72.0                    | 98.7                     |
| P21    | RT-AS>10   | MGI CoolMPS                     | 60.3                    | 98.6                     |
| P23    | C          | MGI CoolMPS                     | 65.4                    | 98.7                     |
| P24    | C          | MGI CoolMPS                     | 68.9                    | 98.3                     |
| P26    | C          | MGI CoolMPS                     | 83.7                    | 98.1                     |
| P27    | C          | MGI CoolMPS                     | 58.7                    | 97.8                     |
| P28    | C          | MGI CoolMPS                     | 55.7                    | 98.8                     |
| P30    | RT         | MGI CoolMPS                     | 45.6                    | 98.5                     |
| P31    | RT         | MGI CoolMPS                     | 59.6                    | 98.3                     |
| P32    | RT         | MGI CoolMPS                     | 60.6                    | 98.7                     |
| P33    | RT         | MGI CoolMPS                     | 73.4                    | 98.3                     |
| P34    | RT         | MGI CoolMPS                     | 70.1                    | 98.6                     |
| P35    | RT         | MGI CoolMPS                     | 61.7                    | 98.6                     |
| P36    | RT         | MGI CoolMPS                     | 73.2                    | 97.9                     |
| P37    | RT         | MGI CoolMPS                     | 100.5                   | 98.2                     |
| P41    | RT         | MGI CoolMPS                     | 82.4                    | 98.6                     |
| P42    | RT         | MGI CoolMPS                     | 66.3                    | 98.6                     |

|                                    |    |             |                                   |                                  |
|------------------------------------|----|-------------|-----------------------------------|----------------------------------|
| P43                                | RT | MGI CoolMPS | 89.5                              | 98.4                             |
| P45                                | RT | MGI CoolMPS | 78.7                              | 98.4                             |
| P46                                | RT | MGI CoolMPS | 77.5                              | 98.5                             |
| P48                                | RT | MGI CoolMPS | 66.3                              | 97.5                             |
| P49                                | RT | MGI CoolMPS | 74.3                              | 98.7                             |
| P50                                | RT | MGI CoolMPS | 66.2                              | 98.9                             |
| P51                                | RT | MGI CoolMPS | 64.9                              | 98.6                             |
| <b>Average <math>\pm</math> SD</b> |    |             | <b>71.1 <math>\pm</math> 10.7</b> | <b>98.4 <math>\pm</math> 0.4</b> |

**Additional File 2 Table 4.** HISAT2 alignment against the reference genome assembly (GRCh38.p5) with Ensemble 84 annotation utilising the publicly available grch38\_tran pre-built HISAT index showing total aligned reads in million and overall alignment rate % for muscle samples (n=51) sequenced by MGI, Latvia using CoolMPS reagents used in downstream DGE/GSEA analyses. RP: Returning Participant; \_V1 or \_V2: RP Visit 1 or 2; C: Control; RT: Resistance Trained; RT-AS $\leq$ 2: RT Exposed to AAS  $\leq$ 2 weeks before sampling; RT-AS $>$ 10: RT Exposed to AAS  $>$ 10 weeks before sampling.



| Sample | Group      | Sequencing Location & Chemistry | Total Reads (Million) | % CDS Exons | % Introns |
|--------|------------|---------------------------------|-----------------------|-------------|-----------|
| RP1_V1 | RT-AS>10   | UoB Standard                    | 139.4                 | 46.6        | 31.2      |
| RP2_V1 | RT-AS≤2    | UoB Standard                    | 141.4                 | 47.9        | 29.2      |
| RP2_V2 | RP Visit 2 | UoB Standard                    | 77.3                  | 54.3        | 24.4      |
| RP3_V1 | RT-AS≤2    | UoB Standard                    | 112.2                 | 53.5        | 25.9      |
| RP3_V2 | RP Visit 2 | UoB Standard                    | 86.6                  | 56.5        | 22.1      |
| RP4_V1 | RT-AS≤2    | UoB Standard                    | 168.7                 | 53.1        | 25.7      |
| RP4_V2 | RP Visit 2 | UoB Standard                    | 110.0                 | 48.6        | 28.9      |
| RP5_V1 | RT-AS≤2    | UoB Standard                    | 103.9                 | 46.2        | 28.8      |
| RP5_V2 | RP Visit 2 | UoB Standard                    | 136.5                 | 46.5        | 30.6      |
| P01    | RT-AS≤2    | UoB Standard                    | 82.0                  | 48.1        | 29.4      |
| P02    | RT-AS≤2    | UoB Standard                    | 111.5                 | 50.6        | 26.7      |
| P03    | RT-AS≤2    | UoB Standard                    | 131.6                 | 43.0        | 33.6      |
| P05    | RT-AS≤2    | UoB Standard                    | 80.5                  | 63.6        | 18.2      |
| P07    | RT-AS≤2    | UoB Standard                    | 91.2                  | 62.8        | 17.1      |
| P08    | RT-AS≤2    | UoB Standard                    | 105.1                 | 50.2        | 27.3      |
| P09    | RT-AS≤2    | UoB Standard                    | 108.2                 | 49.8        | 21.2      |
| P10    | RT-AS≤2    | UoB Standard                    | 115.0                 | 50.3        | 27.7      |
| P12    | RT-AS≤2    | UoB Standard                    | 216.1                 | 61.0        | 17.6      |
| P13    | RT-AS≤2    | UoB Standard                    | 83.0                  | 32.5        | 26.4      |
| P06    | RT-AS>10   | UoB Standard                    | 126.8                 | 51.4        | 27.1      |
| P11    | RT-AS>10   | UoB Standard                    | 99.3                  | 51.2        | 26.1      |
| P14    | RT-AS>10   | UoB Standard                    | 151.3                 | 55.4        | 23.2      |
| P16    | RT-AS>10   | UoB Standard                    | 125.2                 | 50.3        | 26.8      |
| P17    | RT-AS>10   | UoB Standard                    | 120.1                 | 55.0        | 24.7      |
| P18    | RT-AS>10   | UoB Standard                    | 106.9                 | 45.9        | 30.8      |
| P19    | RT-AS>10   | UoB Standard                    | 150.6                 | 53.6        | 24.9      |
| P20    | RT-AS>10   | UoB Standard                    | 90.3                  | 42.1        | 26.9      |
| P21    | RT-AS>10   | UoB Standard                    | 120.0                 | 46.3        | 30.0      |
| P22    | C          | UoB Standard                    | 129.4                 | 44.8        | 32.1      |
| P23    | C          | UoB Standard                    | 98.6                  | 48.3        | 28.2      |
| P24    | C          | UoB Standard                    | 94.1                  | 54.5        | 26.1      |
| P25    | C          | UoB Standard                    | 136.5                 | 54.8        | 25.1      |
| P26    | C          | UoB Standard                    | 69.7                  | 48.2        | 29.9      |
| P27    | C          | UoB Standard                    | 133.1                 | 50.9        | 26.8      |
| P28    | C          | UoB Standard                    | 83.6                  | 49.9        | 28.6      |
| P29    | RT         | UoB Standard                    | 171.1                 | 45.0        | 32.7      |
| P30    | RT         | UoB Standard                    | 176.4                 | 46.8        | 31.6      |
| P31    | RT         | UoB Standard                    | 112.4                 | 61.7        | 17.8      |
| P32    | RT         | UoB Standard                    | 106.5                 | 49.4        | 27.3      |
| P33    | RT         | UoB Standard                    | 87.6                  | 69.2        | 12.9      |
| P34    | RT         | UoB Standard                    | 84.7                  | 51.7        | 21.8      |
| P35    | RT         | UoB Standard                    | 62.9                  | 53.9        | 20.9      |
| P36    | RT         | UoB Standard                    | 76.5                  | 37.2        | 25.3      |
| P37    | RT         | UoB Standard                    | 105.6                 | 40.9        | 31.3      |
| P38    | RT         | UoB Standard                    | 126.3                 | 42.5        | 34.0      |

|                     |    |              |              |            |            |
|---------------------|----|--------------|--------------|------------|------------|
| P39                 | RT | UoB Standard | 97.1         | 43.5       | 27.9       |
| P40                 | RT | UoB Standard | 132.0        | 53.4       | 25.0       |
| P42                 | RT | UoB Standard | 176.6        | 53.5       | 23.8       |
| P44                 | RT | UoB Standard | 102.0        | 48.5       | 28.0       |
| P45                 | RT | UoB Standard | 82.3         | 58.3       | 21.7       |
| P46                 | RT | UoB Standard | 126.9        | 43.7       | 33.6       |
| P48                 | RT | UoB Standard | 113.9        | 50.6       | 22.8       |
| P49                 | RT | UoB Standard | 144.2        | 49.7       | 27.9       |
| P50                 | RT | UoB Standard | 110.7        | 50.3       | 28.3       |
| P51                 | RT | UoB Standard | 97.3         | 47.4       | 25.4       |
| <b>Average ± SD</b> |    |              | 115.1 ± 30.2 | 50.3 ± 6.4 | 26.4 ± 4.5 |

**Additional File 2 Table 5.** RSeQC read distribution for whole blood samples (n=55) sequenced at the University of Brighton (UoB) using standard reagents used in downstream DGE/GSEA analyses including the total reads, % CDS Exons tag counts and % Intron tag counts aligned to the reference genome assembly (GRCh38.p5) with Ensemble 84 annotation as the publicly available HISAT2 index was utilised. RP: Returning Participant; \_V1 or \_V2: RP Visit 1 or 2; C: Control; RT: Resistance Trained; RT-AS $\leq$ 2: RT Exposed to AAS  $\leq$ 2 weeks before sampling; RT-AS $>$ 10: RT Exposed to AAS  $>$ 10 weeks before sampling; CDS: coding sequences.

| Sample | Group      | Sequencing Location & Chemistry | Total Reads (Million) | % CDS Exons | % Introns |
|--------|------------|---------------------------------|-----------------------|-------------|-----------|
| RP1_V1 | RT-AS>10   | MGI Standard                    | 120.0                 | 46.4        | 31.3      |
| RP2_V1 | RT-AS≤2    | MGI Standard                    | 120.7                 | 47.7        | 29.2      |
| RP2_V2 | RP Visit 2 | MGI Standard                    | 83.9                  | 53.5        | 24.7      |
| RP3_V1 | RT-AS≤2    | MGI Standard                    | 124.2                 | 53.6        | 25.7      |
| RP3_V2 | RP Visit 2 | MGI Standard                    | 95.0                  | 56.3        | 22.4      |
| RP4_V1 | RT-AS≤2    | MGI Standard                    | 113.3                 | 52.4        | 26.3      |
| RP4_V2 | RP Visit 2 | MGI Standard                    | 113.1                 | 47.9        | 29.2      |
| P01    | RT-AS≤2    | MGI Standard                    | 91.5                  | 48.0        | 29.5      |
| P02    | RT-AS≤2    | MGI Standard                    | 105.0                 | 50.3        | 26.8      |
| P03    | RT-AS≤2    | MGI Standard                    | 112.8                 | 43.0        | 33.6      |
| P05    | RT-AS≤2    | MGI Standard                    | 95.8                  | 63.0        | 18.5      |
| P07    | RT-AS≤2    | MGI Standard                    | 115.1                 | 61.3        | 17.4      |
| P08    | RT-AS≤2    | MGI Standard                    | 132.0                 | 49.8        | 27.5      |
| P09    | RT-AS≤2    | MGI Standard                    | 101.0                 | 49.4        | 21.3      |
| P10    | RT-AS≤2    | MGI Standard                    | 139.2                 | 49.0        | 28.5      |
| P12    | RT-AS≤2    | MGI Standard                    | 165.2                 | 60.9        | 17.5      |
| P06    | RT-AS>10   | MGI Standard                    | 104.8                 | 50.9        | 27.5      |
| P11    | RT-AS>10   | MGI Standard                    | 97.5                  | 50.5        | 26.3      |
| P14    | RT-AS>10   | MGI Standard                    | 170.0                 | 55.3        | 23.3      |
| P16    | RT-AS>10   | MGI Standard                    | 113.1                 | 50.4        | 26.7      |
| P18    | RT-AS>10   | MGI Standard                    | 141.8                 | 44.8        | 31.2      |
| P19    | RT-AS>10   | MGI Standard                    | 99.8                  | 52.3        | 25.9      |
| P21    | RT-AS>10   | MGI Standard                    | 115.1                 | 46.7        | 29.6      |
| P22    | C          | MGI Standard                    | 132.8                 | 44.7        | 32.2      |
| P23    | C          | MGI Standard                    | 106.9                 | 47.1        | 29.3      |
| P24    | C          | MGI Standard                    | 91.2                  | 53.4        | 26.6      |
| P25    | C          | MGI Standard                    | 122.9                 | 54.7        | 25.3      |
| P27    | C          | MGI Standard                    | 107.4                 | 50.3        | 27.1      |
| P28    | C          | MGI Standard                    | 88.2                  | 49.8        | 28.5      |
| P29    | RT         | MGI Standard                    | 144.7                 | 45.3        | 32.6      |
| P30    | RT         | MGI Standard                    | 150.9                 | 46.8        | 31.8      |
| P31    | RT         | MGI Standard                    | 118.5                 | 61.1        | 18.1      |
| P33    | RT         | MGI Standard                    | 97.5                  | 67.4        | 13.5      |
| P34    | RT         | MGI Standard                    | 98.4                  | 51.3        | 21.8      |
| P35    | RT         | MGI Standard                    | 75.2                  | 53.5        | 21.0      |
| P36    | RT         | MGI Standard                    | 88.1                  | 37.3        | 25.3      |
| P37    | RT         | MGI Standard                    | 110.0                 | 41.0        | 31.0      |
| P38    | RT         | MGI Standard                    | 127.2                 | 43.1        | 33.5      |
| P39    | RT         | MGI Standard                    | 93.2                  | 43.8        | 27.7      |
| P40    | RT         | MGI Standard                    | 146.0                 | 52.5        | 25.3      |
| P42    | RT         | MGI Standard                    | 132.9                 | 52.6        | 24.1      |
| P45    | RT         | MGI Standard                    | 124.6                 | 57.9        | 21.8      |
| P46    | RT         | MGI Standard                    | 99.6                  | 43.2        | 33.8      |
| P48    | RT         | MGI Standard                    | 157.8                 | 50.1        | 23.1      |
| P50    | RT         | MGI Standard                    | 90.5                  | 50.4        | 28.2      |

|                                    |    |              |                  |                |                |
|------------------------------------|----|--------------|------------------|----------------|----------------|
| P51                                | RT | MGI Standard | 88.6             | 47.4           | 25.6           |
| <b>Average <math>\pm</math> SD</b> |    |              | 114.4 $\pm$ 22.5 | 50.6 $\pm$ 6.0 | 26.2 $\pm$ 4.7 |

**Additional File 2 Table 6.** RSeQC read distribution for whole blood samples (n=46) sequenced at MGI, Latvia using standard reagents used in downstream DGE/GSEA analyses including the total reads, % CDS Exons tag counts and % Intron tag counts aligned to the reference genome assembly (GRCh38.p5) with Ensemble 84 annotation as the publicly available HISAT2 index was utilised. RP: Returning Participant; \_V1 or \_V2: RP Visit 1 or 2; C: Control; RT: Resistance Trained; RT-AS $\leq$ 2: RT Exposed to AAS  $\leq$ 2 weeks before sampling; RT-AS $>$ 10: RT Exposed to AAS  $>$ 10 weeks before sampling; CDS: coding sequences.

| Sample | Group      | Sequencing Location & Chemistry | Total Reads (Millions) | % CDS Exons | % Introns |
|--------|------------|---------------------------------|------------------------|-------------|-----------|
| RP1_V1 | RT-AS>10   | MGI Standard                    | 98.1                   | 70.6        | 13.6      |
| RP2_V1 | RT-AS≤2    | MGI Standard                    | 124.5                  | 68.8        | 15.9      |
| RP2_V2 | RP Visit 2 | MGI Standard                    | 165.6                  | 66.4        | 17.9      |
| RP3_V1 | RT-AS≤2    | MGI Standard                    | 106.8                  | 64.8        | 17.9      |
| RP3_V2 | RP Visit 2 | MGI Standard                    | 132.5                  | 64.6        | 18.4      |
| RP4_V1 | RT-AS≤2    | MGI Standard                    | 142.9                  | 67.3        | 17.2      |
| RP4_V2 | RP Visit 2 | MGI Standard                    | 124.5                  | 60.6        | 20.7      |
| RP5_V1 | RT-AS≤2    | MGI Standard                    | 159.9                  | 65.3        | 18.6      |
| P01    | RT-AS≤2    | MGI Standard                    | 158.0                  | 66.9        | 17.2      |
| P02    | RT-AS≤2    | MGI Standard                    | 135.8                  | 66.8        | 17.7      |
| P03    | RT-AS≤2    | MGI Standard                    | 120.6                  | 67.4        | 17.1      |
| P04    | RT-AS≤2    | MGI Standard                    | 154.9                  | 67.6        | 16.4      |
| P05    | RT-AS≤2    | MGI Standard                    | 151.3                  | 65.9        | 17.8      |
| P07    | RT-AS≤2    | MGI Standard                    | 116.2                  | 65.6        | 18.7      |
| P08    | RT-AS≤2    | MGI Standard                    | 133.6                  | 67.8        | 16.5      |
| P09    | RT-AS≤2    | MGI Standard                    | 146.9                  | 66.1        | 17.4      |
| P10    | RT-AS≤2    | MGI Standard                    | 107.1                  | 66.5        | 17.4      |
| P12    | RT-AS≤2    | MGI Standard                    | 109.2                  | 65.6        | 18.3      |
| P13    | RT-AS≤2    | MGI Standard                    | 219.0                  | 65.4        | 18.9      |
| P06    | RT-AS>10   | MGI Standard                    | 118.3                  | 66.7        | 17.8      |
| P11    | RT-AS>10   | MGI Standard                    | 136.8                  | 65.5        | 18.7      |
| P14    | RT-AS>10   | MGI Standard                    | 141.3                  | 66.1        | 18.2      |
| P15    | RT-AS>10   | MGI Standard                    | 145.1                  | 60.2        | 19.9      |
| P16    | RT-AS>10   | MGI Standard                    | 155.1                  | 66.9        | 17.0      |
| P17    | RT-AS>10   | MGI Standard                    | 128.0                  | 68.0        | 16.2      |
| P18    | RT-AS>10   | MGI Standard                    | 138.5                  | 67.5        | 16.9      |
| P19    | RT-AS>10   | MGI Standard                    | 112.3                  | 66.5        | 17.8      |
| P20    | RT-AS>10   | MGI Standard                    | 138.3                  | 65.0        | 19.8      |
| P21    | RT-AS>10   | MGI Standard                    | 131.8                  | 64.9        | 19.4      |
| P23    | C          | MGI Standard                    | 136.9                  | 61.8        | 21.9      |
| P24    | C          | MGI Standard                    | 137.5                  | 63.6        | 20.6      |
| P26    | C          | MGI Standard                    | 125.6                  | 69.2        | 13.9      |
| P27    | C          | MGI Standard                    | 108.3                  | 70.4        | 11.9      |
| P28    | C          | MGI Standard                    | 79.1                   | 63.8        | 20.5      |
| P30    | RT         | MGI Standard                    | 108.8                  | 74.8        | 8.2       |
| P31    | RT         | MGI Standard                    | 107.9                  | 66.8        | 17.5      |
| P32    | RT         | MGI Standard                    | 109.0                  | 65.9        | 18.4      |
| P33    | RT         | MGI Standard                    | 126.8                  | 68.0        | 15.6      |
| P34    | RT         | MGI Standard                    | 139.3                  | 66.7        | 18.0      |
| P35    | RT         | MGI Standard                    | 110.1                  | 71.0        | 13.8      |
| P36    | RT         | MGI Standard                    | 132.6                  | 69.2        | 14.7      |
| P37    | RT         | MGI Standard                    | 178.9                  | 64.6        | 18.5      |
| P41    | RT         | MGI Standard                    | 148.9                  | 63.2        | 20.9      |
| P42    | RT         | MGI Standard                    | 118.5                  | 67.7        | 17.8      |
| P43    | RT         | MGI Standard                    | 139.0                  | 68.8        | 15.1      |

|                     |    |              |              |            |            |
|---------------------|----|--------------|--------------|------------|------------|
| P45                 | RT | MGI Standard | 137.6        | 73.4       | 10.9       |
| P46                 | RT | MGI Standard | 132.4        | 65.9       | 17.6       |
| P48                 | RT | MGI Standard | 111.0        | 72.8       | 10.6       |
| P49                 | RT | MGI Standard | 132.9        | 65.4       | 18.7       |
| P50                 | RT | MGI Standard | 128.6        | 66.9       | 17.7       |
| P51                 | RT | MGI Standard | 125.9        | 67.7       | 16.4       |
| <b>Average ± SD</b> |    |              | 131.9 ± 22.5 | 66.8 ± 2.8 | 17.1 ± 2.7 |

**Additional File 2 Table 7.** RSeQC read distribution for muscle samples (N=51) sequenced by MGI, Latvia using standard reagents used in downstream DGE/GSEA analyses including the total reads, % CDS Exons tag counts and % Intron tag counts aligned to the reference genome assembly (GRCh38.p5) with Ensemble 84 annotation as the publicly available HISAT2 index was utilised. RP: Returning Participant; \_V1 or \_V2: RP Visit 1 or 2; C: Control; RT: Resistance Trained; RT-AS $\leq$ 2: RT Exposed to AAS  $\leq$ 2 weeks before sampling; RT-AS $>$ 10: RT Exposed to AAS  $>$ 10 weeks before sampling; CDS: coding sequences.

| Sample | Group      | Sequencing Location & Chemistry | Total Reads (Millions) | % CDS Exons | % Introns |
|--------|------------|---------------------------------|------------------------|-------------|-----------|
| RP1_V1 | RT-AS>10   | MGI CoolMPS                     | 107.7                  | 70.6        | 13.6      |
| RP2_V1 | RT-AS≤2    | MGI CoolMPS                     | 127.6                  | 68.6        | 16.1      |
| RP2_V2 | RP Visit 2 | MGI CoolMPS                     | 142.1                  | 66.4        | 18.1      |
| RP3_V1 | RT-AS≤2    | MGI CoolMPS                     | 118.9                  | 64.8        | 18.0      |
| RP3_V2 | RP Visit 2 | MGI CoolMPS                     | 153.3                  | 64.4        | 18.4      |
| RP4_V1 | RT-AS≤2    | MGI CoolMPS                     | 167.7                  | 67.3        | 17.3      |
| RP4_V2 | RP Visit 2 | MGI CoolMPS                     | 113.9                  | 59.5        | 20.5      |
| RP5_V1 | RT-AS≤2    | MGI CoolMPS                     | 158.1                  | 65.6        | 18.6      |
| P01    | RT-AS≤2    | MGI CoolMPS                     | 138.1                  | 66.9        | 17.1      |
| P02    | RT-AS≤2    | MGI CoolMPS                     | 146.0                  | 67.1        | 17.6      |
| P03    | RT-AS≤2    | MGI CoolMPS                     | 147.6                  | 67.3        | 17.0      |
| P04    | RT-AS≤2    | MGI CoolMPS                     | 177.2                  | 67.1        | 16.7      |
| P05    | RT-AS≤2    | MGI CoolMPS                     | 163.8                  | 66.3        | 17.6      |
| P07    | RT-AS≤2    | MGI CoolMPS                     | 123.5                  | 65.8        | 18.6      |
| P08    | RT-AS≤2    | MGI CoolMPS                     | 145.2                  | 67.5        | 16.6      |
| P09    | RT-AS≤2    | MGI CoolMPS                     | 152.4                  | 66.2        | 17.3      |
| P10    | RT-AS≤2    | MGI CoolMPS                     | 119.0                  | 66.3        | 17.4      |
| P12    | RT-AS≤2    | MGI CoolMPS                     | 114.0                  | 66.0        | 18.1      |
| P13    | RT-AS≤2    | MGI CoolMPS                     | 142.7                  | 65.4        | 19.0      |
| P06    | RT-AS>10   | MGI CoolMPS                     | 127.6                  | 66.7        | 17.9      |
| P11    | RT-AS>10   | MGI CoolMPS                     | 155.8                  | 64.8        | 19.1      |
| P14    | RT-AS>10   | MGI CoolMPS                     | 155.3                  | 65.7        | 18.1      |
| P15    | RT-AS>10   | MGI CoolMPS                     | 155.0                  | 59.4        | 20.0      |
| P16    | RT-AS>10   | MGI CoolMPS                     | 170.9                  | 66.6        | 17.1      |
| P17    | RT-AS>10   | MGI CoolMPS                     | 143.6                  | 67.6        | 16.4      |
| P18    | RT-AS>10   | MGI CoolMPS                     | 155.9                  | 67.0        | 17.2      |
| P19    | RT-AS>10   | MGI CoolMPS                     | 117.4                  | 66.9        | 17.6      |
| P20    | RT-AS>10   | MGI CoolMPS                     | 142.1                  | 65.1        | 19.9      |
| P21    | RT-AS>10   | MGI CoolMPS                     | 118.9                  | 65.2        | 19.2      |
| P23    | C          | MGI CoolMPS                     | 129.0                  | 62.5        | 21.5      |
| P24    | C          | MGI CoolMPS                     | 135.4                  | 63.7        | 20.4      |
| P26    | C          | MGI CoolMPS                     | 164.2                  | 68.4        | 13.9      |
| P27    | C          | MGI CoolMPS                     | 114.8                  | 70.8        | 11.9      |
| P28    | C          | MGI CoolMPS                     | 110.1                  | 64.0        | 20.3      |
| P30    | RT         | MGI CoolMPS                     | 89.8                   | 74.6        | 8.2       |
| P31    | RT         | MGI CoolMPS                     | 117.2                  | 66.8        | 17.6      |
| P32    | RT         | MGI CoolMPS                     | 119.6                  | 66.2        | 18.2      |
| P33    | RT         | MGI CoolMPS                     | 144.4                  | 67.4        | 16.0      |
| P34    | RT         | MGI CoolMPS                     | 138.1                  | 66.6        | 18.0      |
| P35    | RT         | MGI CoolMPS                     | 121.7                  | 70.9        | 13.9      |
| P36    | RT         | MGI CoolMPS                     | 143.2                  | 69.1        | 14.6      |
| P37    | RT         | MGI CoolMPS                     | 197.4                  | 64.0        | 18.4      |
| P41    | RT         | MGI CoolMPS                     | 162.5                  | 63.0        | 21.0      |
| P42    | RT         | MGI CoolMPS                     | 130.7                  | 67.8        | 17.8      |
| P43    | RT         | MGI CoolMPS                     | 176.1                  | 68.6        | 15.0      |

|                     |    |             |              |            |            |
|---------------------|----|-------------|--------------|------------|------------|
| P45                 | RT | MGI CoolMPS | 154.9        | 73.2       | 11.0       |
| P46                 | RT | MGI CoolMPS | 152.7        | 65.2       | 17.8       |
| P48                 | RT | MGI CoolMPS | 129.4        | 72.3       | 10.6       |
| P49                 | RT | MGI CoolMPS | 146.7        | 65.1       | 18.8       |
| P50                 | RT | MGI CoolMPS | 130.9        | 66.7       | 17.8       |
| P51                 | RT | MGI CoolMPS | 128.1        | 67.8       | 16.3       |
| <b>Average ± SD</b> |    |             | 140.0 ± 21.1 | 66.6 ± 2.8 | 17.2 ± 2.6 |

**Additional File 2 Table 8.** RSeQC read distribution for muscle samples (N=51) sequenced by MGI, Latvia using CoolMPS reagents used in downstream DGE/GSEA analyses including the total reads, % CDS Exons tag counts and % Intron tag counts aligned to the reference genome assembly (GRCh38.p5) with Ensemble 84 annotation as the publicly available HISAT2 index was utilised. RP: Returning Participant; \_V1 or \_V2: RP Visit 1 or 2; C: Control; RT: Resistance Trained; RT-AS $\leq$ 2: RT Exposed to AAS  $\leq$ 2 weeks before sampling; RT-AS $>$ 10: RT Exposed to AAS  $>$ 10 weeks before sampling; CDS: coding sequences.



| <b>Sample</b> | <b>Group</b> | <b>Sequencing Location &amp; Chemistry</b> | <b>Processed Reads (Million)</b> | <b>Mapped Reads %</b> |
|---------------|--------------|--------------------------------------------|----------------------------------|-----------------------|
| RP1_V1        | RT-AS>10     | UoB Standard                               | 71.5                             | 51.8                  |
| RP2_V1        | RT-AS≤2      | UoB Standard                               | 72.7                             | 53.8                  |
| RP2_V2        | RP Visit 2   | UoB Standard                               | 40.1                             | 59.6                  |
| RP3_V1        | RT-AS≤2      | UoB Standard                               | 57.6                             | 58.3                  |
| RP3_V2        | RP Visit 2   | UoB Standard                               | 44.5                             | 63.1                  |
| RP4_V1        | RT-AS≤2      | UoB Standard                               | 86.9                             | 57.7                  |
| RP4_V2        | RP Visit 2   | UoB Standard                               | 56.5                             | 55.3                  |
| RP5_V1        | RT-AS≤2      | UoB Standard                               | 54.8                             | 51.2                  |
| RP5_V2        | RP Visit 2   | UoB Standard                               | 70.1                             | 53.2                  |
| P01           | RT-AS≤2      | UoB Standard                               | 42.6                             | 53.6                  |
| P02           | RT-AS≤2      | UoB Standard                               | 57.5                             | 55.4                  |
| P03           | RT-AS≤2      | UoB Standard                               | 67.6                             | 50.1                  |
| P05           | RT-AS≤2      | UoB Standard                               | 41.4                             | 66.6                  |
| P07           | RT-AS≤2      | UoB Standard                               | 46.9                             | 67.9                  |
| P08           | RT-AS≤2      | UoB Standard                               | 53.9                             | 56.2                  |
| P09           | RT-AS≤2      | UoB Standard                               | 56.9                             | 51.2                  |
| P10           | RT-AS≤2      | UoB Standard                               | 59.0                             | 55.6                  |
| P12           | RT-AS≤2      | UoB Standard                               | 110.6                            | 68.3                  |
| P13           | RT-AS≤2      | UoB Standard                               | 44.5                             | 33.5                  |
| P06           | RT-AS>10     | UoB Standard                               | 65.4                             | 56.4                  |
| P11           | RT-AS>10     | UoB Standard                               | 51.1                             | 58.2                  |
| P14           | RT-AS>10     | UoB Standard                               | 78.0                             | 61.7                  |
| P16           | RT-AS>10     | UoB Standard                               | 64.3                             | 56.5                  |
| P17           | RT-AS>10     | UoB Standard                               | 62.2                             | 58.5                  |
| P18           | RT-AS>10     | UoB Standard                               | 55.2                             | 51.5                  |
| P19           | RT-AS>10     | UoB Standard                               | 77.7                             | 58.2                  |
| P20           | RT-AS>10     | UoB Standard                               | 48.3                             | 45.8                  |
| P21           | RT-AS>10     | UoB Standard                               | 61.7                             | 53.2                  |
| P22           | C            | UoB Standard                               | 66.4                             | 50.9                  |
| P23           | C            | UoB Standard                               | 51.3                             | 54.1                  |
| P24           | C            | UoB Standard                               | 48.4                             | 57.4                  |
| P25           | C            | UoB Standard                               | 70.2                             | 58.9                  |
| P26           | C            | UoB Standard                               | 36.1                             | 53.3                  |
| P27           | C            | UoB Standard                               | 68.5                             | 56.7                  |
| P28           | C            | UoB Standard                               | 43.1                             | 54.5                  |
| P29           | RT           | UoB Standard                               | 88.0                             | 50.7                  |
| P30           | RT           | UoB Standard                               | 90.8                             | 51.8                  |
| P31           | RT           | UoB Standard                               | 58.2                             | 67.5                  |
| P32           | RT           | UoB Standard                               | 54.7                             | 57.1                  |
| P33           | RT           | UoB Standard                               | 45.2                             | 74.8                  |
| P34           | RT           | UoB Standard                               | 44.3                             | 54.7                  |
| P35           | RT           | UoB Standard                               | 33.2                             | 57.6                  |
| P36           | RT           | UoB Standard                               | 41.5                             | 37.7                  |
| P37           | RT           | UoB Standard                               | 55.1                             | 45.2                  |
| P38           | RT           | UoB Standard                               | 65.0                             | 48.8                  |

|                     |    |              |             |            |
|---------------------|----|--------------|-------------|------------|
| P39                 | RT | UoB Standard | 51.0        | 48.5       |
| P40                 | RT | UoB Standard | 67.6        | 59.3       |
| P42                 | RT | UoB Standard | 90.5        | 59.8       |
| P44                 | RT | UoB Standard | 52.9        | 55.4       |
| P45                 | RT | UoB Standard | 42.5        | 62.7       |
| P46                 | RT | UoB Standard | 65.3        | 49.5       |
| P48                 | RT | UoB Standard | 58.8        | 57.6       |
| P49                 | RT | UoB Standard | 74.6        | 55.6       |
| P50                 | RT | UoB Standard | 56.9        | 55.1       |
| P51                 | RT | UoB Standard | 51.3        | 51.5       |
| <b>Average ± SD</b> |    |              | 59.5 ± 15.4 | 55.4 ± 6.9 |

**Additional File 2 Table 9.** Number of processed reads and percentage of mapped reads by Salmon for whole blood samples (n=55) sequenced at the University of Brighton (UoB) using standard reagents used in downstream DGE/GSEA analyses. Salmon indexing against the publicly available hg38 full decoy-aware salmon index. RP: Returning Participant; \_V1 or \_V2: RP Visit 1 or 2; C: Control; RT: Resistance Trained; RT-AS $\leq$ 2: RT Exposed to AAS  $\leq$ 2 weeks before sampling; RT-AS $>$ 10: RT Exposed to AAS  $>$ 10 weeks before sampling.

| <b>Sample</b> | <b>Group</b> | <b>Sequencing Location &amp; Chemistry</b> | <b>Processed Reads (Million)</b> | <b>Mapped Reads %</b> |
|---------------|--------------|--------------------------------------------|----------------------------------|-----------------------|
| RP1_V1        | RT-AS>10     | MGI Standard                               | 61.8                             | 51.7                  |
| RP2_V1        | RT-AS≤2      | MGI Standard                               | 62.9                             | 53.5                  |
| RP2_V2        | RP Visit 2   | MGI Standard                               | 44.0                             | 58.8                  |
| RP3_V1        | RT-AS≤2      | MGI Standard                               | 63.9                             | 58.4                  |
| RP3_V2        | RP Visit 2   | MGI Standard                               | 49.9                             | 62.2                  |
| RP4_V1        | RT-AS≤2      | MGI Standard                               | 58.5                             | 57.0                  |
| RP4_V2        | RP Visit 2   | MGI Standard                               | 58.4                             | 55.0                  |
| P01           | RT-AS≤2      | MGI Standard                               | 47.7                             | 53.4                  |
| P02           | RT-AS≤2      | MGI Standard                               | 54.3                             | 55.1                  |
| P03           | RT-AS≤2      | MGI Standard                               | 58.2                             | 50.0                  |
| P05           | RT-AS≤2      | MGI Standard                               | 49.5                             | 66.1                  |
| P07           | RT-AS≤2      | MGI Standard                               | 60.0                             | 66.9                  |
| P08           | RT-AS≤2      | MGI Standard                               | 69.1                             | 55.3                  |
| P09           | RT-AS≤2      | MGI Standard                               | 55.2                             | 49.9                  |
| P10           | RT-AS≤2      | MGI Standard                               | 73.2                             | 54.3                  |
| P12           | RT-AS≤2      | MGI Standard                               | 86.5                             | 68.0                  |
| P06           | RT-AS>10     | MGI Standard                               | 54.2                             | 55.8                  |
| P11           | RT-AS>10     | MGI Standard                               | 50.9                             | 57.6                  |
| P14           | RT-AS>10     | MGI Standard                               | 87.9                             | 61.6                  |
| P16           | RT-AS>10     | MGI Standard                               | 59.2                             | 56.3                  |
| P18           | RT-AS>10     | MGI Standard                               | 74.4                             | 50.6                  |
| P19           | RT-AS>10     | MGI Standard                               | 51.7                             | 57.0                  |
| P21           | RT-AS>10     | MGI Standard                               | 60.3                             | 53.2                  |
| P22           | C            | MGI Standard                               | 68.3                             | 50.8                  |
| P23           | C            | MGI Standard                               | 55.8                             | 53.0                  |
| P24           | C            | MGI Standard                               | 47.6                             | 56.4                  |
| P25           | C            | MGI Standard                               | 63.5                             | 58.6                  |
| P27           | C            | MGI Standard                               | 56.0                             | 56.1                  |
| P28           | C            | MGI Standard                               | 45.6                             | 54.5                  |
| P29           | RT           | MGI Standard                               | 74.6                             | 50.5                  |
| P30           | RT           | MGI Standard                               | 77.9                             | 51.7                  |
| P31           | RT           | MGI Standard                               | 61.6                             | 66.8                  |
| P33           | RT           | MGI Standard                               | 51.0                             | 73.5                  |
| P34           | RT           | MGI Standard                               | 52.8                             | 53.8                  |
| P35           | RT           | MGI Standard                               | 41.0                             | 56.6                  |
| P36           | RT           | MGI Standard                               | 50.0                             | 36.9                  |
| P37           | RT           | MGI Standard                               | 59.1                             | 44.6                  |
| P38           | RT           | MGI Standard                               | 67.0                             | 48.9                  |
| P39           | RT           | MGI Standard                               | 50.5                             | 48.1                  |
| P40           | RT           | MGI Standard                               | 76.4                             | 58.5                  |
| P42           | RT           | MGI Standard                               | 69.4                             | 59.1                  |
| P45           | RT           | MGI Standard                               | 64.6                             | 62.1                  |
| P46           | RT           | MGI Standard                               | 51.3                             | 49.3                  |
| P48           | RT           | MGI Standard                               | 83.9                             | 56.6                  |
| P50           | RT           | MGI Standard                               | 47.6                             | 54.8                  |

|                                    |    |              |                 |                |
|------------------------------------|----|--------------|-----------------|----------------|
| P51                                | RT | MGI Standard | 48.2            | 50.8           |
| <b>Average <math>\pm</math> SD</b> |    |              | 59.9 $\pm$ 11.5 | 55.6 $\pm$ 6.4 |

**Additional File 2 Table 10.** Number of processed reads and percentage of mapped reads by Salmon for whole blood samples (n=46) sequenced at MGI, Latvia using standard reagents used in downstream DGE/GSEA analyses. Salmon indexing against the publicly available hg38 full decoy-aware salmon index. RP: Returning Participant; \_V1 or \_V2: RP Visit 1 or 2; C: Control; RT: Resistance Trained; RT-AS $\leq$ 2: RT Exposed to AAS  $\leq$ 2 weeks before sampling; RT-AS $>$ 10: RT Exposed to AAS  $>$ 10 weeks before sampling.

| Sample | Group      | Sequencing Location & Chemistry | Processed Reads (Million) | Mapped Reads % |
|--------|------------|---------------------------------|---------------------------|----------------|
| RP1_V1 | RT-AS>10   | MGI Standard                    | 50.6                      | 75.7           |
| RP2_V1 | RT-AS≤2    | MGI Standard                    | 64.6                      | 72.7           |
| RP2_V2 | RP Visit 2 | MGI Standard                    | 86.5                      | 70.0           |
| RP3_V1 | RT-AS≤2    | MGI Standard                    | 55.1                      | 68.0           |
| RP3_V2 | RP Visit 2 | MGI Standard                    | 71.0                      | 68.3           |
| RP4_V1 | RT-AS≤2    | MGI Standard                    | 75.6                      | 70.2           |
| RP4_V2 | RP Visit 2 | MGI Standard                    | 67.8                      | 60.5           |
| RP5_V1 | RT-AS≤2    | MGI Standard                    | 84.9                      | 68.7           |
| P01    | RT-AS≤2    | MGI Standard                    | 83.8                      | 70.2           |
| P02    | RT-AS≤2    | MGI Standard                    | 71.8                      | 70.1           |
| P03    | RT-AS≤2    | MGI Standard                    | 64.1                      | 70.6           |
| P04    | RT-AS≤2    | MGI Standard                    | 80.2                      | 71.7           |
| P05    | RT-AS≤2    | MGI Standard                    | 80.0                      | 69.8           |
| P07    | RT-AS≤2    | MGI Standard                    | 59.7                      | 69.3           |
| P08    | RT-AS≤2    | MGI Standard                    | 71.3                      | 70.8           |
| P09    | RT-AS≤2    | MGI Standard                    | 78.2                      | 69.1           |
| P10    | RT-AS≤2    | MGI Standard                    | 57.2                      | 69.6           |
| P12    | RT-AS≤2    | MGI Standard                    | 56.2                      | 69.6           |
| P13    | RT-AS≤2    | MGI Standard                    | 113.7                     | 68.6           |
| P06    | RT-AS>10   | MGI Standard                    | 60.8                      | 70.2           |
| P11    | RT-AS>10   | MGI Standard                    | 70.8                      | 68.9           |
| P14    | RT-AS>10   | MGI Standard                    | 74.8                      | 67.8           |
| P15    | RT-AS>10   | MGI Standard                    | 77.7                      | 60.6           |
| P16    | RT-AS>10   | MGI Standard                    | 83.2                      | 69.7           |
| P17    | RT-AS>10   | MGI Standard                    | 66.1                      | 72.5           |
| P18    | RT-AS>10   | MGI Standard                    | 71.5                      | 71.7           |
| P19    | RT-AS>10   | MGI Standard                    | 57.9                      | 70.6           |
| P20    | RT-AS>10   | MGI Standard                    | 71.8                      | 67.9           |
| P21    | RT-AS>10   | MGI Standard                    | 67.9                      | 68.6           |
| P23    | C          | MGI Standard                    | 70.6                      | 65.1           |
| P24    | C          | MGI Standard                    | 72.0                      | 66.2           |
| P26    | C          | MGI Standard                    | 68.2                      | 71.1           |
| P27    | C          | MGI Standard                    | 56.0                      | 75.4           |
| P28    | C          | MGI Standard                    | 40.6                      | 67.5           |
| P30    | RT         | MGI Standard                    | 57.1                      | 80.5           |
| P31    | RT         | MGI Standard                    | 55.4                      | 70.3           |
| P32    | RT         | MGI Standard                    | 56.2                      | 69.7           |
| P33    | RT         | MGI Standard                    | 65.6                      | 72.7           |
| P34    | RT         | MGI Standard                    | 73.0                      | 69.4           |
| P35    | RT         | MGI Standard                    | 56.4                      | 75.8           |
| P36    | RT         | MGI Standard                    | 71.1                      | 73.2           |
| P37    | RT         | MGI Standard                    | 97.4                      | 65.7           |
| P41    | RT         | MGI Standard                    | 79.4                      | 65.4           |
| P42    | RT         | MGI Standard                    | 60.8                      | 71.1           |
| P43    | RT         | MGI Standard                    | 73.8                      | 73.0           |

|                     |    |              |             |            |
|---------------------|----|--------------|-------------|------------|
| P45                 | RT | MGI Standard | 71.1        | 79.9       |
| P46                 | RT | MGI Standard | 70.1        | 67.4       |
| P48                 | RT | MGI Standard | 59.3        | 77.5       |
| P49                 | RT | MGI Standard | 70.9        | 67.6       |
| P50                 | RT | MGI Standard | 67.0        | 70.2       |
| P51                 | RT | MGI Standard | 66.8        | 71.6       |
| <b>Average ± SD</b> |    |              | 69.3 ± 12.2 | 70.2 ± 3.8 |

**Additional File 2 Table 11.** Number of processed reads and percentage of mapped reads by Salmon for muscle samples (N=51) sequenced at MGI, Latvia using standard reagents used in downstream DGE/GSEA analyses. Salmon indexing against the publicly available hg38 full decoy-aware salmon index. RP: Returning Participant; \_V1 or \_V2: RP Visit 1 or 2; C: Control; RT: Resistance Trained; RT-AS $\leq$ 2: RT Exposed to AAS  $\leq$ 2 weeks before sampling; RT-AS $>$ 10: RT Exposed to AAS  $>$ 10 weeks before sampling.

| Sample | Group      | Sequencing Location & Chemistry | Processed Reads (Million) | Mapped Reads % |
|--------|------------|---------------------------------|---------------------------|----------------|
| RP1_V1 | RT-AS>10   | MGI CoolMPS                     | 50.6                      | 75.7           |
| RP2_V1 | RT-AS≤2    | MGI CoolMPS                     | 64.6                      | 72.7           |
| RP2_V2 | RP Visit 2 | MGI CoolMPS                     | 86.5                      | 70.0           |
| RP3_V1 | RT-AS≤2    | MGI CoolMPS                     | 55.1                      | 68.0           |
| RP3_V2 | RP Visit 2 | MGI CoolMPS                     | 71.0                      | 68.3           |
| RP4_V1 | RT-AS≤2    | MGI CoolMPS                     | 79.0                      | 71.2           |
| RP4_V2 | RP Visit 2 | MGI CoolMPS                     | 67.8                      | 60.5           |
| RP5_V1 | RT-AS≤2    | MGI CoolMPS                     | 73.3                      | 70.2           |
| P01    | RT-AS≤2    | MGI CoolMPS                     | 83.8                      | 70.2           |
| P02    | RT-AS≤2    | MGI CoolMPS                     | 69.2                      | 71.5           |
| P03    | RT-AS≤2    | MGI CoolMPS                     | 64.1                      | 70.6           |
| P04    | RT-AS≤2    | MGI CoolMPS                     | 80.2                      | 71.7           |
| P05    | RT-AS≤2    | MGI CoolMPS                     | 75.9                      | 71.3           |
| P07    | RT-AS≤2    | MGI CoolMPS                     | 59.7                      | 69.3           |
| P08    | RT-AS≤2    | MGI CoolMPS                     | 66.2                      | 72.0           |
| P09    | RT-AS≤2    | MGI CoolMPS                     | 71.8                      | 70.4           |
| P10    | RT-AS≤2    | MGI CoolMPS                     | 54.8                      | 70.8           |
| P12    | RT-AS≤2    | MGI CoolMPS                     | 56.2                      | 69.6           |
| P13    | RT-AS≤2    | MGI CoolMPS                     | 113.7                     | 68.6           |
| P06    | RT-AS>10   | MGI CoolMPS                     | 60.8                      | 70.2           |
| P11    | RT-AS>10   | MGI CoolMPS                     | 70.8                      | 68.9           |
| P14    | RT-AS>10   | MGI CoolMPS                     | 74.8                      | 67.8           |
| P15    | RT-AS>10   | MGI CoolMPS                     | 77.7                      | 60.6           |
| P16    | RT-AS>10   | MGI CoolMPS                     | 78.6                      | 71.0           |
| P17    | RT-AS>10   | MGI CoolMPS                     | 66.1                      | 72.5           |
| P18    | RT-AS>10   | MGI CoolMPS                     | 71.5                      | 71.7           |
| P19    | RT-AS>10   | MGI CoolMPS                     | 57.9                      | 70.6           |
| P20    | RT-AS>10   | MGI CoolMPS                     | 71.8                      | 67.9           |
| P21    | RT-AS>10   | MGI CoolMPS                     | 67.9                      | 68.6           |
| P23    | C          | MGI CoolMPS                     | 70.6                      | 65.1           |
| P24    | C          | MGI CoolMPS                     | 72.0                      | 66.2           |
| P26    | C          | MGI CoolMPS                     | 68.2                      | 71.1           |
| P27    | C          | MGI CoolMPS                     | 56.0                      | 75.4           |
| P28    | C          | MGI CoolMPS                     | 40.6                      | 67.5           |
| P30    | RT         | MGI CoolMPS                     | 57.1                      | 80.5           |
| P31    | RT         | MGI CoolMPS                     | 55.4                      | 70.3           |
| P32    | RT         | MGI CoolMPS                     | 56.2                      | 69.7           |
| P33    | RT         | MGI CoolMPS                     | 65.6                      | 72.7           |
| P34    | RT         | MGI CoolMPS                     | 73.0                      | 69.4           |
| P35    | RT         | MGI CoolMPS                     | 56.4                      | 75.8           |
| P36    | RT         | MGI CoolMPS                     | 71.1                      | 73.2           |
| P37    | RT         | MGI CoolMPS                     | 91.4                      | 66.6           |
| P41    | RT         | MGI CoolMPS                     | 74.6                      | 66.7           |
| P42    | RT         | MGI CoolMPS                     | 60.8                      | 71.1           |
| P43    | RT         | MGI CoolMPS                     | 73.8                      | 73.0           |

|                     |    |             |             |            |
|---------------------|----|-------------|-------------|------------|
| P45                 | RT | MGI CoolMPS | 71.1        | 79.9       |
| P46                 | RT | MGI CoolMPS | 70.1        | 67.4       |
| P48                 | RT | MGI CoolMPS | 59.3        | 77.5       |
| P49                 | RT | MGI CoolMPS | 67.8        | 68.8       |
| P50                 | RT | MGI CoolMPS | 67.0        | 70.2       |
| P51                 | RT | MGI CoolMPS | 61.0        | 72.9       |
| <b>Average ± SD</b> |    |             | 68.2 ± 11.6 | 70.5 ± 3.7 |

**Additional File 2 Table 12.** Number of processed reads and percentage of mapped reads by Salmon for muscle samples (N=51) sequenced at MGI, Latvia using CoolMPS reagents used in downstream DGE/GSEA analyses. Salmon indexing against the publicly available hg38 full decoy-aware salmon index. RP: Returning Participant; \_V1 or \_V2: RP Visit 1 or 2; C: Control; RT: Resistance Trained; RT-AS $\leq$ 2: RT Exposed to AAS  $\leq$ 2 weeks before sampling; RT-AS $>$ 10: RT Exposed to AAS  $>$ 10 weeks before sampling.



**Additional File 2 Table 13a.** The number of genes identified for DGE from whole blood samples sequenced with standard chemistry reagents at UoB.

| <b>Tissue</b>                    | <b>Comparison</b>                      |                                                             |
|----------------------------------|----------------------------------------|-------------------------------------------------------------|
| Blood                            | RP2-5:<br>Visit 2 (n=4), Visit 1 (n=4) | Group:<br>C=7, RT=20, RT-AS $\leq$ 2=14, RT-AS $\geq$ 10=10 |
| Low-expressed genes              | 14,636                                 | 13,637                                                      |
| Genes available for DGE analysis | 14,353                                 | 15,352                                                      |

**Additional File 2 Table 13b.** The number of genes identified for DGE from whole blood samples sequenced with standard chemistry reagents at MGI.

| <b>Tissue</b>                    | <b>Comparison</b>                      |                                                            |
|----------------------------------|----------------------------------------|------------------------------------------------------------|
| Blood                            | RP2-4:<br>Visit 2 (n=3), Visit 1 (n=3) | Group:<br>C=6, RT=17, RT-AS $\leq$ 2=12, RT-AS $\geq$ 10=8 |
| Low-expressed genes              | 14,314                                 | 13,374                                                     |
| Genes available for DGE analysis | 14,675                                 | 15,615                                                     |

**Additional File 2 Table 13c.** The number of genes identified for DGE from muscle samples sequenced with standard reagents at MGI.

| <b>Tissue</b>                    | <b>Comparison</b>                      |                                                             |
|----------------------------------|----------------------------------------|-------------------------------------------------------------|
| Muscle                           | RP2-4:<br>Visit 2 (n=3), Visit 1 (n=3) | Group:<br>C=5, RT=17, RT-AS $\leq$ 2=15, RT-AS $\geq$ 10=11 |
| Low-expressed genes              | 13,639                                 | 12,302                                                      |
| Genes available for DGE analysis | 15,350                                 | 16,687                                                      |

**Additional File 2 Table 13d.** The number of genes identified for DGE from muscle samples sequenced with CoolMPS reagents at MGI.

| <b>Tissue</b>                    | <b>Comparison</b>                      |                                                             |
|----------------------------------|----------------------------------------|-------------------------------------------------------------|
| Muscle                           | RP2-4:<br>Visit 2 (n=3), Visit 1 (n=3) | Group:<br>C=5, RT=17, RT-AS $\leq$ 2=15, RT-AS $\geq$ 10=11 |
| Low-expressed genes              | 13,645                                 | 12,332                                                      |
| Genes available for DGE analysis | 15,344                                 | 16,657                                                      |

DGE: differential gene expression; UoB: University of Brighton; RP: Returning Participant; RT-AS $\leq$ 2: Resistance Trained participant who self-declared AAS exposure ceased  $\leq$ 2 weeks before sampling; RT-AS $\geq$ 10: Resistance Trained participant who self-declared AAS exposure ceased  $\geq$ 10 weeks before sampling.

**Additional File 2 Table 14a.** Number of differentially expressed genes across different group comparisons for blood samples sequenced with standard chemistry reagents at UoB subjected to DGE analysis.

| Comparison                                    |                               |                                           |                                            |                                             |                                              |                                                          |                       |
|-----------------------------------------------|-------------------------------|-------------------------------------------|--------------------------------------------|---------------------------------------------|----------------------------------------------|----------------------------------------------------------|-----------------------|
| RP2-5 Visit 2<br>(n=4)<br>vs<br>Visit 1 (n=4) | RT<br>(n=20)<br>vs<br>C (n=7) | RT-AS $\leq$ 2<br>(n=14)<br>vs<br>C (n=7) | RT-AS $\geq$ 10<br>(n=10)<br>vs<br>C (n=7) | RT-AS $\leq$ 2<br>(n=14)<br>vs<br>RT (n=20) | RT-AS $\geq$ 10<br>(n=10)<br>vs<br>RT (n=20) | RT-AS $\leq$ 2<br>(n=14)<br>vs<br>RT-AS $\geq$ 10 (n=10) | Up/Down<br>regulation |
| 0                                             | 0                             | 0                                         | 0                                          | 0                                           | 1                                            | 0                                                        | Up                    |
| 0                                             | 1                             | 0                                         | 0                                          | 0                                           | 0                                            | 1                                                        | Down                  |

**Additional File 2 Table 14b.** Number of differentially expressed genes across different group comparisons for blood samples sequenced with standard chemistry reagents at MGI subjected to DGE analysis.

| Comparison                                    |                               |                                           |                                           |                                             |                                             |                                                         |                       |
|-----------------------------------------------|-------------------------------|-------------------------------------------|-------------------------------------------|---------------------------------------------|---------------------------------------------|---------------------------------------------------------|-----------------------|
| RP2-4 Visit 2<br>(n=3)<br>vs<br>Visit 1 (n=3) | RT<br>(n=17)<br>vs<br>C (n=6) | RT-AS $\leq$ 2<br>(n=12)<br>vs<br>C (n=6) | RT-AS $\geq$ 10<br>(n=8)<br>vs<br>C (n=6) | RT-AS $\leq$ 2<br>(n=12)<br>vs<br>RT (n=17) | RT-AS $\geq$ 10<br>(n=8)<br>vs<br>RT (n=17) | RT-AS $\leq$ 2<br>(n=12)<br>vs<br>RT-AS $\geq$ 10 (n=8) | Up/Down<br>regulation |
| 1                                             | 0                             | 0                                         | 0                                         | 0                                           | 1                                           | 0                                                       | Up                    |
| 10                                            | 2                             | 1                                         | 0                                         | 0                                           | 0                                           | 0                                                       | Down                  |

**Additional File 2 Table 14c.** Number of differentially expressed genes across different group comparisons for muscle samples sequenced with standard reagents at MGI subjected to DGE analysis.

| Comparison                                        |                                   |                                               |                                                |                                                 |                                                  |                                                              |                    |
|---------------------------------------------------|-----------------------------------|-----------------------------------------------|------------------------------------------------|-------------------------------------------------|--------------------------------------------------|--------------------------------------------------------------|--------------------|
| RP2-4 Visit 2 (n=3)<br><i>vs</i><br>Visit 1 (n=3) | RT (n=17)<br><i>vs</i><br>C (n=5) | RT-AS $\leq$ 2 (n=15)<br><i>vs</i><br>C (n=5) | RT-AS $\geq$ 10 (n=11)<br><i>vs</i><br>C (n=5) | RT-AS $\leq$ 2 (n=15)<br><i>vs</i><br>RT (n=17) | RT-AS $\geq$ 10 (n=11)<br><i>vs</i><br>RT (n=17) | RT-AS $\leq$ 2 (n=15)<br><i>vs</i><br>RT-AS $\geq$ 10 (n=11) | Up/Down regulation |
| 2                                                 | 2                                 | 34                                            | 2                                              | 120                                             | 0                                                | 12                                                           | Up                 |
| 0                                                 | 3                                 | 28                                            | 0                                              | 52                                              | 0                                                | 7                                                            | Down               |

**Additional File 2 Table 14d.** Number of differentially expressed genes across different group comparisons for muscle samples sequenced with CoolMPS reagents at MGI subjected to DGE analysis.

| Comparison                                        |                                   |                                               |                                                |                                                 |                                                  |                                                              |                    |
|---------------------------------------------------|-----------------------------------|-----------------------------------------------|------------------------------------------------|-------------------------------------------------|--------------------------------------------------|--------------------------------------------------------------|--------------------|
| RP2-4 Visit 2 (n=3)<br><i>vs</i><br>Visit 1 (n=3) | RT (n=17)<br><i>vs</i><br>C (n=5) | RT-AS $\leq$ 2 (n=15)<br><i>vs</i><br>C (n=5) | RT-AS $\geq$ 10 (n=11)<br><i>vs</i><br>C (n=5) | RT-AS $\leq$ 2 (n=15)<br><i>vs</i><br>RT (n=17) | RT-AS $\geq$ 10 (n=11)<br><i>vs</i><br>RT (n=17) | RT-AS $\leq$ 2 (n=15)<br><i>vs</i><br>RT-AS $\geq$ 10 (n=11) | Up/Down regulation |
| 4                                                 | 2                                 | 38                                            | 2                                              | 94                                              | 0                                                | 21                                                           | Up                 |
| 0                                                 | 2                                 | 41                                            | 0                                              | 50                                              | 0                                                | 17                                                           | Down               |

Genes with a false discovery rate (FDR) < 0.05 and fold change of 1.2 were reported as differentially expressed. DGE: differential gene expression; UoB: University of Brighton; RP: Returning Participant; C: non-resistance trained control group; RT: Resistance Trained control group RT-AS $\leq$ 2: Resistance Trained participant who self-declared AAS exposure ceased  $\leq$ 2 weeks before sampling; RT-AS $\geq$ 10: Resistance Trained participant who self-declared AAS exposure ceased  $\geq$ 10 weeks before sampling.

**Additional File 2 Table 15a.** Number of differentially expressed gene sets or pathways across different group comparisons for muscle samples sequenced with standard reagents at MGI subjected to GSEA analysis.

| Comparison                                           |                                      |                                                  |                                                   |                                                    |                                                     |                                                                 |                        |
|------------------------------------------------------|--------------------------------------|--------------------------------------------------|---------------------------------------------------|----------------------------------------------------|-----------------------------------------------------|-----------------------------------------------------------------|------------------------|
| RP2-4 Visit 2<br>(n=3)<br><i>vs</i><br>Visit 1 (n=3) | RT<br>(n=17)<br><i>vs</i><br>C (n=5) | RT-AS $\leq$ 2<br>(n=15)<br><i>vs</i><br>C (n=5) | RT-AS $\geq$ 10<br>(n=11)<br><i>vs</i><br>C (n=5) | RT-AS $\leq$ 2<br>(n=15)<br><i>vs</i><br>RT (n=17) | RT-AS $\geq$ 10<br>(n=11)<br><i>vs</i><br>RT (n=17) | RT-AS $\leq$ 2<br>(n=15)<br><i>vs</i><br>RT-AS $\geq$ 10 (n=11) | Gene Set or<br>Pathway |
| 0                                                    | 0                                    | 0                                                | 0                                                 | 0                                                  | 0                                                   | 0                                                               | Hallmark               |
| 0                                                    | 0                                    | 1                                                | 0                                                 | 15                                                 | 2                                                   | 0                                                               | KEGG                   |
| 0                                                    | 0                                    | 4                                                | 0                                                 | 119                                                | 0                                                   | 3                                                               | Reactome               |
| 1                                                    | 2                                    | 49                                               | 0                                                 | 439                                                | 0                                                   | 17                                                              | GO BP                  |
| 0                                                    | 1                                    | 18                                               | 0                                                 | 220                                                | 0                                                   | 23                                                              | GO MF                  |

**Additional File 2 Table 15b.** Number of differentially expressed gene sets or pathways across different group comparisons for muscle samples sequenced with CoolMPS reagents at MGI subjected to GSEA analysis.

| Comparison                                           |                                      |                                                  |                                                   |                                                    |                                                     |                                                                 |                        |
|------------------------------------------------------|--------------------------------------|--------------------------------------------------|---------------------------------------------------|----------------------------------------------------|-----------------------------------------------------|-----------------------------------------------------------------|------------------------|
| RP2-4 Visit 2<br>(n=3)<br><i>vs</i><br>Visit 1 (n=3) | RT<br>(n=17)<br><i>vs</i><br>C (n=5) | RT-AS $\leq$ 2<br>(n=15)<br><i>vs</i><br>C (n=5) | RT-AS $\geq$ 10<br>(n=11)<br><i>vs</i><br>C (n=5) | RT-AS $\leq$ 2<br>(n=15)<br><i>vs</i><br>RT (n=17) | RT-AS $\geq$ 10<br>(n=11)<br><i>vs</i><br>RT (n=17) | RT-AS $\leq$ 2<br>(n=15)<br><i>vs</i><br>RT-AS $\geq$ 10 (n=11) | Gene Set or<br>Pathway |
| 0                                                    | 0                                    | 0                                                | 0                                                 | 0                                                  | 3                                                   | 0                                                               | Hallmark               |
| 0                                                    | 0                                    | 2                                                | 0                                                 | 14                                                 | 4                                                   | 0                                                               | KEGG                   |
| 2                                                    | 0                                    | 2                                                | 0                                                 | 89                                                 | 0                                                   | 1                                                               | Reactome               |
| 0                                                    | 0                                    | 18                                               | 0                                                 | 224                                                | 0                                                   | 4                                                               | GO BP                  |
| 0                                                    | 0                                    | 9                                                | 1                                                 | 136                                                | 0                                                   | 8                                                               | GO MF                  |

Gene sets or pathways with a false discovery rate (FDR) < 0.05 were reported as differentially expressed. GSEA: Gene Set Enrichment Analysis; UoB: University of Brighton; RP: Returning Participant; C: non-resistance trained control group; RT: Resistance Trained control group; RT-AS $\leq$ 2: Resistance Trained participant who self-declared AAS exposure ceased  $\leq$ 2 weeks before sampling; RT-AS $\geq$ 10: Resistance Trained participant who self-declared AAS exposure ceased  $\geq$ 10 weeks before sampling; GO BP: subset of GO biological processes; GO MF: subset of GO molecular functions.
